# Supplementary material for: Integrated analysis of DNA methylation and mRNA expression profiles to identify key genes involved in the regrowth of clinically non-functioning pituitary adenoma
Source: Aging (Albany NY). 2020 Feb 3;12(3):2408–27. doi: 10.18632/aging.102751 (PMC7041752; doi:10.18632/aging.102751)
Supplement: Supplementary Table 1 [file aging-12-102751-s002..xlsx]

## Sheet: Sheet1
Supplement Table 1 Clinical information of 71 patients with NFPA
ID	Sex	Age	Volume	Invasive	Regrowth	Resection	PFS	Subtype
NFPA-001	Female	56	Macro	Y	Y	NGTR	54	NC
NFPA-002	Male	57	Macro	Y	N	NGTR	122	GON
NFPA-003	Female	72	Macro	Y	N	GTR	101	NC
NFPA-004	Female	60	Macro	N	N	NGTR	100	NC
NFPA-005	Male	52	Macro	N	Y	NGTR	76	GON
NFPA-006	Female	51	Macro	N	N	GTR	99	NC
NFPA-007	Female	35	Macro	N	Y	NGTR	60	NC
NFPA-008	Male	43	Macro	N	Y	NGTR	48	NC
NFPA-009	Female	29	Giant	Y	Y	GTR	10	NC
NFPA-010	Male	40	Giant	Y	N	NGTR	88	NC
NFPA-011	Male	55	Macro	Y	N	NGTR	88	GON
NFPA-012	Female	38	Macro	N	N	NGTR	88	NC
NFPA-013	Male	64	Giant	N	N	NGTR	88	GON
NFPA-014	Female	59	Macro	Y	N	NGTR	88	NC
NFPA-015	Male	63	Macro	N	N	NGTR	88	GON
NFPA-016	Male	41	Macro	Y	N	NGTR	88	GON
NFPA-017	Female	49	Macro	Y	Y	NGTR	67	GON
NFPA-018	Male	64	Macro	Y	N	GTR	98	NC
NFPA-019	Female	58	Macro	Y	N	GTR	97	NC
NFPA-020	Male	60	Macro	N	N	GTR	97	GON
NFPA-021	Female	38	Macro	Y	N	NGTR	96	NC
NFPA-022	Female	58	Giant	Y	N	GTR	93	NC
NFPA-023	Female	52	Giant	Y	Y	GTR	25	GON
NFPA-024	Female	29	Macro	N	N	GTR	92	NC
NFPA-025	Male	55	Macro	N	N	NGTR	92	GON
NFPA-026	Female	49	Macro	Y	Y	NGTR	44	GON
NFPA-027	Female	33	Giant	Y	Y	GTR	60	NC
NFPA-028	Female	50	Giant	Y	N	NGTR	87	NC
NFPA-029	Male	32	Giant	Y	Y	NGTR	40	GON
NFPA-030	Male	44	Macro	Y	N	NGTR	78	NC
NFPA-031	Male	64	Macro	Y	N	GTR	77	NC
NFPA-032	Male	42	Macro	N	N	NGTR	77	NC
NFPA-033	Male	52	Macro	N	N	GTR	77	NC
NFPA-034	Male	28	Giant	Y	N	GTR	77	NC
NFPA-035	Male	48	Macro	N	N	NGTR	76	NC
NFPA-036	Female	52	Macro	Y	N	NGTR	76	NC
NFPA-037	Male	39	Macro	Y	Y	GTR	43	NC
NFPA-038	Female	49	Macro	Y	N	GTR	85	NC
NFPA-039	Male	62	Macro	N	Y	NGTR	60	GON
NFPA-040	Female	58	Giant	Y	N	GTR	83	NC
NFPA-041	Female	57	Macro	N	N	GTR	83	NC
NFPA-042	Male	43	Macro	Y	Y	NGTR	67	NC
NFPA-043	Male	46	Giant	Y	N	NGTR	83	GON
NFPA-044	Female	47	Macro	Y	N	NGTR	82	GON
NFPA-045	Male	66	Macro	N	N	GTR	77	NC
NFPA-046	Male	56	Macro	Y	N	NGTR	81	GON
NFPA-047	Male	70	Macro	Y	Y	GTR	48	NC
NFPA-048	Male	47	Macro	N	N	GTR	82	NC
NFPA-049	Female	48	Macro	Y	N	NGTR	80	NC
NFPA-050	Female	73	Giant	Y	N	NGTR	75	NC
NFPA-051	Female	51	Macro	Y	Y	GTR	24	NC
NFPA-052	Male	29	Giant	Y	Y	NGTR	39	NC
NFPA-053	Male	52	Macro	N	N	GTR	68	NC
NFPA-054	Male	25	Giant	Y	Y	GTR	5	NC
NFPA-055	Male	53	Macro	N	N	GTR	68	NC
NFPA-056	Female	41	Macro	N	Y	GTR	41	NC
NFPA-057	Female	49	Giant	Y	Y	NGTR	31	NC
NFPA-058	Female	34	Macro	N	Y	GTR	26	NC
NFPA-059	Male	65	Macro	N	N	GTR	40	GON
NFPA-060	Female	44	Macro	N	N	GTR	48	NC
NFPA-061	Female	68	Giant	Y	N	GTR	46	GON
NFPA-062	Male	59	Macro	N	N	GTR	46	NC
NFPA-063	Female	46	Giant	Y	N	GTR	45	NC
NFPA-064	Female	57	Macro	N	N	GTR	45	NC
NFPA-065	Female	57	Giant	Y	N	GTR	45	NC
NFPA-066	Male	58	Macro	N	N	NGTR	28	GON
NFPA-067	Female	57	Giant	N	N	GTR	36	NC
NFPA-068	Male	74	Macro	N	N	NGTR	29	GON
NFPA-069	Male	43	Macro	N	N	GTR	22	GON
NFPA-070	Male	32	Macro	N	N	NGTR	21	NC
NFPA-071	Female	55	Giant	N	N	NGTR	17	GON
Abbreviation: Macro, macro-adenoma (1-4cm); Giant, giant adenoma (≻4cm); GTR, gross total resection; NGTR, non-gross total resection; GON, gonadotroph; NC, null cell.
Tumor of grade 3 or grade 4 of Knosp classification was defined as invasive.
