# Supplementary material for: Integrated analysis of DNA methylation and mRNA expression profiles to identify key genes involved in the regrowth of clinically non-functioning pituitary adenoma
Source: Aging (Albany NY). 2020 Feb 3;12(3):2408–27. doi: 10.18632/aging.102751 (PMC7041752; doi:10.18632/aging.102751)
Supplement: Supplementary Table 2 [file aging-12-102751-s006..xlsx]

## Sheet: Sheet1
Supplement Table 2 Differentially methylated genes
Gene	Deta_Beta
TUBB4Q	-0.215772
NDRG1	-0.202826
OR10H4	-0.19501
LOC148824	-0.194117
KCNMB2	-0.185465
RPL13AP3	-0.185284
PCDHB16	-0.183725
SETMAR	-0.181205
KRT2	-0.17877
SLC2A9	-0.178644
ADCYAP1	-0.178279
MIR6130	-0.178033
CCDC94	-0.177249
NCKAP1L	-0.177099
LOC100505912	-0.176709
OPRD1	-0.175937
LINC01098	-0.175863
LYPD4	-0.173585
DOCK10	-0.173504
DPYD	-0.172831
ITGA7	-0.171246
LINC01441	-0.170947
UGT2B4	-0.170757
ATP6V1G1	-0.170613
CDH4	-0.170348
AMIGO2	-0.1699
MROH1	-0.169229
PRB1	-0.16917
KRT26	-0.168459
TRIM21	-0.167983
EBF2	-0.16798
MYO1B	-0.167905
NFATC4	-0.167542
NCRNA00158	-0.167479
NPSR1-AS1	-0.167393
NCOR2	-0.167192
PPP1R2P3	-0.166253
PALLD	-0.16613
TEX15	-0.165962
RILPL2	-0.165806
AGTR1	-0.165159
CXCL1	-0.164938
NDST4	-0.164813
PPP1R3A	-0.164774
ALS2	-0.163695
KLRD1	-0.163587
LRP1B	-0.163337
LINC01019	-0.163316
C10orf4	-0.163191
SPECC1	-0.162796
HLA-DQA1	-0.162727
GRAMD1C	-0.16269
SPNS2	-0.162377
MAP1LC3A	-0.16194
LOC102723649	-0.161852
TBC1D14	-0.161817
OR4D5	-0.161556
MYADML	-0.161493
CHST9	-0.161226
TLX1NB	-0.160951
NRGN	-0.160699
LINC01320	-0.160602
LOC102724612	-0.160444
GIMAP1	-0.160359
SPRR2E	-0.160232
MIR520G	-0.16013
ARPP21	-0.160069
CCL7	-0.159867
GSTA3	-0.15957
LIMA1	-0.159463
SLC6A15	-0.159444
UNC5C	-0.158949
C21orf91-OT1	-0.158935
CDH12	-0.158756
C1orf14	-0.158496
APLNR	-0.158383
LOC400804	-0.158084
LOC401324	-0.157812
CRP	-0.157784
FMO6P	-0.157687
BTBD16	-0.157559
SMCP	-0.157441
LOC102467224	-0.157437
LOC101928009	-0.157411
SPRR2G	-0.157338
LOC101927058	-0.157154
LOC285692	-0.15689
GCNT2	-0.156524
RAP1GAP2	-0.15638
DNAJC9	-0.156144
DLGAP1	-0.156046
MAGI1	-0.156011
MIR588	-0.155895
CHST8	-0.155626
LINC00466	-0.155506
FAAH	-0.155475
LINC00640	-0.155458
HOXD-AS2	-0.155431
GALNT18	-0.15539
SLC30A8	-0.155297
LOC101054525	-0.155062
CASC16	-0.154966
DLEU1	-0.154887
STK32B	-0.154879
ARHGAP12	-0.154837
MYHAS	-0.154816
ZNF534	-0.154722
ZNF804B	-0.15469
NPTN	-0.154643
RTFDC1	-0.154388
ZEB2	-0.154353
CUL3	-0.154331
RPL31P11	-0.154305
LINC00326	-0.154209
INIP	-0.15412
IFNG	-0.154008
HAS3	-0.153705
CCL11	-0.153604
LOC440173	-0.15328
CHIA	-0.153265
GAPLINC	-0.153211
MREG	-0.153122
CD48	-0.152955
WASF3	-0.152941
S100A12	-0.152939
C4orf17	-0.152743
SDR16C5	-0.152732
OR11G2	-0.152614
LINC01021	-0.152602
LALBA	-0.152505
KLKB1	-0.152437
MIR7702	-0.15229
CXCL13	-0.152205
PTCSC3	-0.152118
LOC101929164	-0.151936
LOC102546226	-0.151852
GNG4	-0.151633
ABI1	-0.151425
ADAM5P	-0.151357
SLC44A5	-0.151262
CMA1	-0.151154
LINC00535	-0.15112
TMEM127	-0.151097
DEFB113	-0.151022
NCEH1	-0.150873
SPAG9	-0.150717
PBK	-0.15069
FLG	-0.15058
LINC01502	-0.150453
LOC102724297	-0.150446
MXI1	-0.15011
RUVBL1-AS1	-0.150091
MMP1	-0.150066
C8orf22	-0.150043
CYTH1	-0.149685
INSC	-0.149677
OR5K4	-0.149661
NALCN-AS1	-0.149488
EPHA5	-0.14946
LOC101927587	-0.149418
SFTA1P	-0.149404
SELPLG	-0.149356
GNAI3	-0.149312
OR52E8	-0.14909
LINC00993	-0.149087
KLHL29	-0.14907
SPINT4	-0.148795
HEPHL1	-0.148618
CCDC71	-0.148601
OR4E2	-0.148551
HOXC4	-0.148407
IQSEC1	-0.148361
PKIB	-0.148359
CCL8	-0.14828
HTR1F	-0.148247
ITGAL	-0.148183
ZNF385D-AS2	-0.148048
RAB10	-0.14793
MICAL3	-0.147908
LOC101927196	-0.147895
RGS6	-0.147773
SCEL	-0.147674
SCN11A	-0.147426
HPSE2	-0.147403
LINC01499	-0.147382
ADH6	-0.147316
LINGO2	-0.147233
GCM2	-0.147162
FLG2	-0.147123
RNF219-AS1	-0.147073
TRIML1	-0.147062
INSL4	-0.146848
LINC00603	-0.146832
HRG	-0.146825
SLC9A3	-0.146792
NR2F2-AS1	-0.146692
LINC01603	-0.146685
FLJ42709	-0.146665
PEX5L	-0.146478
CLCN7	-0.146471
IQCE	-0.146466
SPRR1B	-0.146222
OR2Y1	-0.145996
MTUS1	-0.145925
FMO3	-0.145864
PRR9	-0.145693
ADRA1A	-0.14558
GRIA4	-0.145551
ADAMTS5	-0.145534
GP2	-0.145479
RP1	-0.145409
LOC339622	-0.14537
RNASE6	-0.145357
CELSR1	-0.145294
SLC15A5	-0.145281
CCL2	-0.145083
ACMSD	-0.14508
HRAT17	-0.144914
GPATCH3	-0.144873
LOC729506	-0.144855
ADSS	-0.144813
FLI1	-0.144738
LOC151121	-0.144725
SNORD114-6	-0.144699
LOC101928227	-0.144677
OR1L4	-0.14461
LCE2A	-0.144428
GTSCR1	-0.144404
AZIN1	-0.144389
KLRF2	-0.14437
PATE2	-0.144355
LINC01088	-0.144342
SOHLH1	-0.144251
LINC01572	-0.14424
LOC101927464	-0.144236
OR10A7	-0.143954
IMPG1	-0.143949
WTAPP1	-0.143925
ADAMTS19	-0.143827
PCDHB4	-0.143734
PDE4D	-0.143728
EDNRB	-0.143596
PTGDR	-0.143589
EFCAB1	-0.143537
F2RL1	-0.14349
ASB17	-0.143361
KITLG	-0.143307
S100A7	-0.143226
FMO2	-0.143093
LOC101927412	-0.143092
LCE5A	-0.143019
SDK1	-0.142992
SERPINA4	-0.142953
COLEC12	-0.142892
SDR16C6	-0.14289
NEUROD4	-0.142838
PCNX	-0.142828
WT1	-0.142777
MMP2	-0.142683
LURAP1L	-0.142627
OR9A4	-0.142553
NCRNA00157	-0.142541
LOC101929645	-0.142479
AQP4-AS1	-0.14245
RBM17	-0.142373
BANK1	-0.142265
LOC101927815	-0.142187
SST	-0.142186
LOC100507205	-0.142171
DMP1	-0.142162
LELP1	-0.142106
IVL	-0.142099
FLJ41856	-0.142091
ALAS1	-0.142062
STK3	-0.141976
HS3ST3B1	-0.14187
CDKN2B-AS1	-0.141829
EP400	-0.141746
SPRR4	-0.141737
CTSG	-0.141689
EVC	-0.141652
SPRR2A	-0.141639
KRTAP4-1	-0.141601
ROBO1	-0.141581
CSNK1G3	-0.14157
PRKCB	-0.141501
LOC101928372	-0.141478
LOC100130964	-0.141423
RBM46	-0.141405
ZNF99	-0.141345
LOC158434	-0.141298
SYNE1	-0.141289
IL16	-0.141161
OR5AS1	-0.141138
PRB2	-0.141117
SGK223	-0.141114
TMEM225	-0.141092
SH3TC2	-0.141074
RETN	-0.140914
MFSD6L	-0.140848
SATB2	-0.14084
GPC5	-0.140815
LOC729384	-0.140768
AHCTF1P1	-0.140757
DAB2	-0.140682
GLYAT	-0.140679
CRISP1	-0.140653
SPRR3	-0.140599
FAM58B	-0.140594
ABCA8	-0.14057
GRIA1	-0.140543
ASZ1	-0.140514
LINC00840	-0.140491
FSTL5	-0.140453
BMP6	-0.140382
RSPO4	-0.140331
VAV3	-0.140261
SPRR2C	-0.140217
SPOCK3	-0.140211
CUZD1	-0.140173
SLC25A12	-0.140123
DCTN3	-0.139842
NWD2	-0.139816
C5orf17	-0.139808
PCAT18	-0.139772
RNASE2	-0.139767
C5orf23	-0.139635
C8orf46	-0.139626
KIAA0125	-0.139607
PSG8	-0.139597
TEAD2	-0.139566
DAOA-AS1	-0.139549
OR6B1	-0.13949
LPAR1	-0.139433
C15orf43	-0.139404
FNTB	-0.139375
METTL7B	-0.139336
SPRR1A	-0.139316
SASH1	-0.13926
C22orf40	-0.139257
LOC728606	-0.139233
GRIK3	-0.139217
ABCA6	-0.13916
KDR	-0.139151
LINC00710	-0.139114
MOBP	-0.139103
OR8K1	-0.139057
NCAPD3	-0.139022
DOCK1	-0.139009
CRYBG3	-0.139006
TWIST2	-0.138963
PCAT19	-0.138928
MS4A12	-0.138914
STPG2-AS1	-0.138892
OR2M1P	-0.138834
TOX	-0.138819
SULT1C2P1	-0.138816
KIAA1217	-0.138804
GRID2	-0.138799
C1orf150	-0.13876
SYNPO2	-0.138711
RCC1	-0.138655
LOC285768	-0.138639
LOC101929631	-0.138511
HLA-DRA	-0.13851
UGT2B15	-0.138509
CRNN	-0.138508
XIRP2	-0.138462
KLHL1	-0.138447
CCDC105	-0.138443
COL6A5	-0.138442
HCLS1	-0.138424
LINC01322	-0.138402
ATP6V0C	-0.138383
ERG	-0.138268
LINC01349	-0.138262
LINC00392	-0.138243
WNT16	-0.138205
DPYSL2	-0.138191
LOC340094	-0.138185
ELTD1	-0.138126
OR4D6	-0.137977
KIT	-0.137952
TGIF1	-0.137952
OR5AU1	-0.137894
EYS	-0.137853
KRTAP21-2	-0.137834
CD19	-0.137778
MMP12	-0.137764
LOC100506272	-0.137676
OR6C75	-0.137659
PAX3	-0.137624
LOC101929660	-0.137622
MDM1	-0.137622
MIR548H3	-0.137604
SYK	-0.137546
EXOSC2	-0.137484
DLX6AS	-0.137481
IL20RA	-0.137452
CCL3	-0.137425
SLC17A3	-0.137417
ARHGAP28	-0.137358
ECRP	-0.13735
TUSC2	-0.137327
ESR1	-0.137251
OR4N5	-0.13724
CNTN5	-0.137183
NEK2	-0.137181
UBASH3B	-0.13717
MIR516A2	-0.13706
MED19	-0.137056
WDR24	-0.137047
SLCO1A2	-0.137044
TNFAIP8L3	-0.137032
LOC283867	-0.137022
LURAP1L-AS1	-0.136991
KIF26B	-0.136972
MDGA2	-0.136967
CSN1S1	-0.136903
FMO4	-0.136878
WDR49	-0.136826
ANKRD28	-0.136781
AKR1C4	-0.136754
MIR802	-0.136746
CDH5	-0.13668
DMBT1	-0.13667
ANKRD26P1	-0.136611
FAR2	-0.136574
IQCF1	-0.136564
S100A7A	-0.136516
MMP27	-0.136478
MS4A13	-0.136466
LINC00645	-0.136466
CCL13	-0.136368
MMP7	-0.136301
TRIM58	-0.136287
UPP1	-0.136236
STC2	-0.136231
HCN1	-0.136197
PCDHB3	-0.136141
CFH	-0.136141
MGST1	-0.136116
OR52B2	-0.136111
FAM135B	-0.136107
OVCH1-AS1	-0.136105
OR5K2	-0.136093
ZNF365	-0.13608
LINC00351	-0.136052
LOC101928535	-0.136022
SLC29A1	-0.136002
SNRNP27	-0.135971
RUNX1	-0.135926
PATE3	-0.135899
FAM131C	-0.135866
MNDA	-0.13584
GGH	-0.135837
PTGFR	-0.135834
FPR1	-0.13579
CHRNA7	-0.135762
LINC01399	-0.13565
SPIDR	-0.135645
CRCT1	-0.135546
MIR154	-0.135521
RNF212	-0.13549
MASP1	-0.135469
C18orf2	-0.13546
CASP7	-0.135454
NPR3	-0.135412
LINC00534	-0.1354
CD244	-0.135371
APBB1IP	-0.135354
LCE1A	-0.135346
OR6K2	-0.135267
SPAM1	-0.135263
IL1F6	-0.135252
ABCB11	-0.135198
RNF146	-0.135197
OR2T5	-0.135171
LCE1E	-0.135135
IQGAP2	-0.135117
ANK3	-0.135116
ZNF679	-0.135072
CLEC9A	-0.135058
TMEM132C	-0.135038
LOC100128317	-0.13501
PIP5K1A	-0.134995
EXOSC10	-0.13494
NUP43	-0.134879
OR6N1	-0.134789
C11orf82	-0.134768
MIR138-1	-0.134757
TRPM1	-0.134741
CHD2	-0.134731
RPTN	-0.134695
MLK7-AS1	-0.134669
SEMG2	-0.134634
TRIM36	-0.134618
LINC00158	-0.134614
BLNK	-0.134518
OR4S2	-0.134461
LINC01435	-0.134454
MARS	-0.13445
COL4A4	-0.134426
YAF2	-0.134414
ARHGAP10	-0.134407
PDZRN3	-0.134392
CALN1	-0.13439
PGLYRP3	-0.13439
LINC01450	-0.134349
MYO10	-0.1342
IGF2BP3	-0.13419
OR10X1	-0.134184
ABCC9	-0.134158
KRT84	-0.134151
EREG	-0.134118
DNAJC5G	-0.134109
OR1C1	-0.134093
LINC00624	-0.134051
ARPP-21	-0.134049
TRIM55	-0.134019
LOC101926942	-0.133976
OR56A1	-0.133953
LINC00945	-0.133927
CYP2B6	-0.133922
LINC01317	-0.133881
TTRAP	-0.133857
RNASE3	-0.133808
NCALD	-0.133798
INSL6	-0.133772
REG3A	-0.133737
SLC23A2	-0.133734
OR52I2	-0.133691
MCAT	-0.133688
SIGLEC6	-0.133643
AKR1D1	-0.133629
STXBP6	-0.133626
NLRP7	-0.133606
TPRG1	-0.133605
SH3GL2	-0.133604
S100A8	-0.133585
LINC01146	-0.133555
LOC101928269	-0.13354
RYK	-0.133456
SPRR2D	-0.133401
SLC22A9	-0.133381
NLRP2	-0.133378
TSHZ2	-0.133328
LINC01020	-0.133305
FAM170B-AS1	-0.133296
RPH3A	-0.133253
IZUMO1R	-0.133243
LINC01432	-0.133157
OR6K3	-0.133117
OR2C1	-0.133116
ASIC5	-0.133115
CD1A	-0.1331
ZNF140	-0.133094
HLA-DQB2	-0.133043
KRT32	-0.133009
CD1B	-0.13299
ARHGAP42	-0.132976
ZNF451	-0.132974
NFATC2	-0.132972
AKR1C6P	-0.132956
PCDHB12	-0.132949
HHIP	-0.132946
LOC392232	-0.132922
ITGAM	-0.132922
PLEK	-0.132898
KCNK2	-0.13287
LINC00343	-0.132868
LCE1B	-0.132865
CRHBP	-0.13285
LOC152225	-0.132806
S100A7L2	-0.132803
ZSCAN5B	-0.132777
GNASAS	-0.132772
WFDC10B	-0.13277
C2orf74	-0.132767
KARS	-0.132747
KIAA1462	-0.132697
KIAA1026	-0.132564
MS4A4A	-0.132551
OR1N2	-0.132546
FLJ45983	-0.132478
MIR5095	-0.13244
MUSK	-0.132414
PLD5	-0.132411
LINC01455	-0.132398
CD300E	-0.132376
EHF	-0.132343
TTC29	-0.132334
OPN5	-0.13231
LOC101929058	-0.132308
SIRPB2	-0.132303
LINC00923	-0.132271
OR8J1	-0.132247
NTM	-0.132244
HERPUD2	-0.132244
MMP20	-0.132227
FIGN	-0.132227
MS4A5	-0.132216
HEPACAM	-0.132211
COMMD6	-0.132172
ERBB2IP	-0.132147
LINC01340	-0.132127
GRM3	-0.13209
BMPR1B	-0.132052
FAM200A	-0.132049
LOC340357	-0.132031
CD84	-0.132008
NDNF	-0.132005
VWC2L	-0.131996
RSPO3	-0.131992
HOPX	-0.131945
SIGLEC8	-0.131918
PLCG2	-0.131904
ACAN	-0.131902
CCDC42	-0.131859
ATP5EP2	-0.131842
IL22RA2	-0.131809
ZNF37B	-0.131737
KCNJ2	-0.13173
OR1A2	-0.13172
SFMBT2	-0.131717
ZSCAN18	-0.131712
LCE6A	-0.131619
MIR181A1HG	-0.131617
LINC01307	-0.131588
PLA2G1B	-0.131559
SPINK7	-0.131539
ITLN2	-0.131534
MUC19	-0.13147
ITLN1	-0.131435
MIR453	-0.131419
OR51B2	-0.131366
PKHD1	-0.131365
FAM92A1P2	-0.131363
BCAT2	-0.131341
FGFBP1	-0.131333
SLC2A12	-0.131331
OR4K17	-0.131309
C8orf34	-0.131303
LOC101927691	-0.131262
OR4K2	-0.131262
RAB37	-0.131232
TEX101	-0.131188
MBOAT1	-0.131138
OR10T2	-0.131126
C12orf54	-0.131084
LOC101927342	-0.131078
C10orf71	-0.131076
TRIM15	-0.131069
TTC25	-0.131029
ZNF304	-0.131026
MYH13	-0.131002
PTPN14	-0.130992
LINC01262	-0.130989
CSMD3	-0.130953
LOC101929019	-0.130929
C1orf110	-0.130924
SLAMF7	-0.130923
DAZAP2	-0.130881
XPOT	-0.130862
NR5A2	-0.130852
CLEC2B	-0.130808
NRM	-0.130806
OR4C15	-0.130794
UBASH3A	-0.130772
LRP2	-0.130738
CFHR2	-0.130684
RALYL	-0.130641
GRIK2	-0.130625
HRNR	-0.13062
LPGAT1	-0.130598
CADM1	-0.13057
CHD9	-0.130535
CLEC19A	-0.130475
IL33	-0.130434
SPRR2F	-0.130393
COL6A4P2	-0.130363
CBLN4	-0.13034
PGR	-0.130333
UST	-0.130287
VTCN1	-0.130281
WDFY4	-0.130244
CMKLR1	-0.130219
SIK2	-0.130196
FAM183A	-0.130194
OPCML	-0.130178
OR2T29	-0.130173
FABP9	-0.13015
KCND2	-0.130134
CYP1B1-AS1	-0.130103
FAM189A1	-0.130089
LOC286114	-0.130076
KCTD1	-0.130076
CENPW	-0.130061
OTX2OS1	-0.130044
HES5	-0.130019
MPDU1	-0.130006
NCRNA00114	-0.129998
LINC00824	-0.129979
SLC25A26	-0.129938
APOPT1	-0.129927
GALNT2	-0.129923
KLK4	-0.129914
LINC01392	-0.129845
LOC101927616	-0.129836
LOC100631378	-0.129785
OR11H6	-0.129774
KANSL1L	-0.129762
CLEC4GP1	-0.129754
ZFPM2-AS1	-0.129728
MIR5694	-0.129723
AMTN	-0.129688
OR5V1	-0.129685
DEFB128	-0.129684
MCMBP	-0.12966
GIMAP5	-0.129659
LOC101929199	-0.129656
PLEKHS1	-0.129652
HCRTR2	-0.129627
NFIB	-0.12957
TNFRSF11A	-0.129501
SNTB1	-0.129474
ADAM18	-0.129467
LOC643711	-0.129418
HPYR1	-0.129401
CGNL1	-0.12939
HGF	-0.129377
TP63	-0.129337
WIF1	-0.129337
LCE1C	-0.129333
SIGLEC15	-0.129332
SKAP2	-0.129285
SLC39A7	-0.129264
ABCB5	-0.129257
CLEC2A	-0.129249
SLC37A4	-0.1292
VAX1	-0.129198
SLC12A8	-0.129188
DYSF	-0.129131
CUL4A	-0.129119
VWF	-0.129105
EBF3	-0.129097
HLA-DQB1	-0.129041
CRX	-0.129034
POU2F1	-0.129003
FRMD6	-0.128972
CCNJ	-0.128969
MPZL2	-0.128954
FCRL2	-0.128951
C17orf103	-0.12895
HLA-DRB6	-0.128948
KRTAP24-1	-0.128943
MIR494	-0.128872
SEPP1	-0.128856
KLRF1	-0.128851
CCL23	-0.12885
LOC441025	-0.128848
C6orf221	-0.128845
TARM1	-0.128822
OR4K1	-0.128818
ACTN1	-0.128787
RBFOX1	-0.128781
XRCC4	-0.128742
UGT3A1	-0.128721
NCRNA00113	-0.128692
MCTP1	-0.128689
LOC102546228	-0.128631
C11orf63	-0.128631
RPS16	-0.128627
GTF3C5	-0.128575
PEX19	-0.128564
MIR548A1	-0.12853
PCDH17	-0.128504
MRPS5	-0.128484
ADAM30	-0.128476
HEATR7B2	-0.12843
HIST1H1B	-0.128414
PRKG1	-0.128414
CMAHP	-0.128381
LOC400867	-0.12838
LOC440117	-0.128372
CSN1S2AP	-0.128357
C10orf72	-0.128344
CD28	-0.128318
SERPINA11	-0.128292
POU1F1	-0.128254
C4orf19	-0.128217
LINC01592	-0.128167
PGCP1	-0.128076
MGC27382	-0.128075
CLK4	-0.128061
LOC340113	-0.128037
IRF4	-0.128031
CATSPERB	-0.128015
LMO3	-0.127962
C13orf39	-0.127931
ESM1	-0.127929
MMADHC	-0.127906
APLF	-0.127905
LOC101927282	-0.127896
METTL11B	-0.127876
LRRC2	-0.127869
IGSF9	-0.127855
CER1	-0.127832
OR10A3	-0.127768
NPFFR2	-0.127764
VCAN	-0.127749
TRAPPC9	-0.127745
GUCY2GP	-0.127715
OR2M7	-0.127671
SLCO5A1	-0.127645
OR5K3	-0.127639
ACSL5	-0.127629
ARFGAP1	-0.127627
MMP3	-0.127581
SLC25A46	-0.127493
LOC101927379	-0.127472
PDE6H	-0.127444
KRT71	-0.127404
TPD52L3	-0.127381
MS4A6A	-0.127379
SLC22A3	-0.127357
LOC101929625	-0.127357
AKR1C2	-0.127343
CUX2	-0.127312
CCDC170	-0.127308
GPR126	-0.127261
RIN2	-0.127232
PDCD1LG2	-0.127172
GRM7-AS3	-0.127154
TBX15	-0.127152
OR4F15	-0.127143
CNNM1	-0.127128
PIK3R5	-0.127088
SERPINA3	-0.127083
WWC2	-0.127069
NHEG1	-0.127059
BTF3L1	-0.12705
CCL18	-0.127019
TP53I3	-0.127009
OR5B12	-0.127007
HS3ST3A1	-0.127005
IRG1	-0.126986
BNC2	-0.126978
SEC16A	-0.126976
ST18	-0.126961
SUGCT	-0.126937
LINC01393	-0.126932
LINC00333	-0.126931
ETNK2	-0.12693
IQCF4	-0.126924
OR12D3	-0.12691
ITK	-0.126903
OR2L13	-0.126885
LOC101927310	-0.126878
TRIM31	-0.126852
GSTA1	-0.126844
LINC00114	-0.126837
PTCHD4	-0.126833
C7	-0.12683
FANCC	-0.126825
NR2F1-AS1	-0.126812
POTEA	-0.126768
OR6P1	-0.126748
HLA-DPB2	-0.126743
RER1	-0.126722
CNIH2	-0.126699
OTOP1	-0.126675
CD1C	-0.126631
SF3A1	-0.126631
MYO1D	-0.126629
WFDC11	-0.126614
DMRT1	-0.126611
C7orf10	-0.126598
LOC101928306	-0.126582
TC2N	-0.126569
CALCR	-0.126563
OR9G4	-0.126563
ITGA6	-0.126561
LOC102467222	-0.126557
ADH1A	-0.126552
TOX3	-0.126538
OR52M1	-0.126532
SLCO1B3	-0.12653
SVIL	-0.126503
AOX1	-0.126471
EPHA6	-0.126466
GHRHR	-0.126463
FLJ26245	-0.12646
C16orf97	-0.12646
IMPG2	-0.126452
CDK10	-0.126447
LY9	-0.12643
CD163	-0.126411
HMCN1	-0.126403
MCC	-0.126401
PAX5	-0.126345
OR6C65	-0.126317
F11	-0.126305
GNL2	-0.126301
CYP2B7P	-0.126299
GATA6	-0.126286
APELA	-0.126283
FCRL3	-0.126226
CYP3A5	-0.126218
LOC339568	-0.126174
ANO6	-0.126136
C12orf42	-0.126127
CLDN14	-0.126047
WRNIP1	-0.12603
SVEP1	-0.126029
BMP7	-0.126011
PRB4	-0.125976
ABCA1	-0.125965
LEO1	-0.125945
LOC102723517	-0.125942
CNTNAP2	-0.125937
LVCAT5	-0.125917
FAM111A	-0.125916
PRMT2	-0.125905
PZP	-0.125892
LOXL2	-0.125881
LONP1	-0.125878
FCGR2A	-0.125869
OR5D18	-0.125867
CYP4B1	-0.125865
HS3ST4	-0.125846
IFNA21	-0.12584
LOC100996671	-0.125824
LOC339788	-0.125821
AMPD2	-0.125807
OR51B5	-0.12579
CYP2E1	-0.125761
CNKSR3	-0.125729
GRIN1	-0.125714
PCGF6	-0.125698
CECR2	-0.125684
GFRAL	-0.125675
VNN3	-0.125673
MIR31HG	-0.125668
IL17F	-0.125643
ALPK1	-0.125612
LOC101927822	-0.125544
EGFLAM	-0.125531
RORB	-0.125526
WFDC6	-0.125475
CCDC129	-0.125408
SLC7A7	-0.125393
CLECL1	-0.125393
KCNJ16	-0.125346
OR5AK2	-0.125329
KPRP	-0.125326
LOC101927078	-0.125323
LOC285780	-0.125316
LOC101927450	-0.125291
OR11L1	-0.125265
HTN1	-0.12526
TFEC	-0.12523
NPDC1	-0.125213
U2AF1	-0.125208
BCL11B	-0.125171
ZNF266	-0.125165
BCL7A	-0.125146
IGFBP7-AS1	-0.125134
CYYR1	-0.125133
PDHA2	-0.12512
FLJ32810	-0.125111
PSMG4	-0.125107
EBPL	-0.125103
ANO2	-0.125066
TFDP2	-0.12506
OSBPL7	-0.125012
LOC100507065	-0.125005
LINC01352	-0.124994
MBOAT4	-0.124991
DTHD1	-0.124988
OR6C74	-0.124913
RPL18	-0.124897
TPM3	-0.124894
PROSC	-0.124882
GDF6	-0.124873
RPP30	-0.124865
PPAPDC1A	-0.12485
LINC01082	-0.12483
KRT6A	-0.124827
CXCL12	-0.124826
CABLES1	-0.124766
LOC100505878	-0.124766
NINL	-0.124751
LEF1	-0.124748
LINC01299	-0.12474
OSGIN1	-0.124736
KNG1	-0.124719
UEVLD	-0.124698
KRTAP5-9	-0.124695
LINC01501	-0.12469
KCNJ15	-0.124679
PTPRF	-0.124666
HTR7	-0.124617
LOC100128554	-0.124605
GAS2	-0.124569
OR51M1	-0.124548
ITGA1	-0.124536
SOX9-AS1	-0.124505
FAM92A3	-0.124481
FBLN5	-0.12448
LOC101927768	-0.124466
BSDC1	-0.124423
C1orf68	-0.124413
PLSCR2	-0.124385
ABI3BP	-0.12438
RABGEF1	-0.124364
SLC45A2	-0.124355
LOC101929268	-0.124335
SLC4A4	-0.124329
DNAH8	-0.124327
PROL1	-0.124326
EPHX1	-0.124316
FMO1	-0.124316
PALM2	-0.124295
CHSY3	-0.124293
CYP19A1	-0.124291
OR5M11	-0.124271
EVA1A	-0.124261
NID2	-0.124258
XXYLT1	-0.124253
FREM1	-0.124241
GPX6	-0.124235
GJA1	-0.124227
SULT1C2	-0.124194
COL23A1	-0.124188
RTP2	-0.12416
RTP1	-0.124143
LOC101927843	-0.12414
PRDM6	-0.124135
HIST1H2AA	-0.124125
LILRB1	-0.124109
KRTAP2-2	-0.124105
LPCAT2	-0.124105
C8orf45	-0.124085
LINC01449	-0.124065
AKR1CL1	-0.124028
NRG3	-0.123985
FLYWCH2	-0.123982
POSTN	-0.123976
PSCA	-0.123968
VPS53	-0.12396
CACNG3	-0.123944
COL14A1	-0.12393
LRIT1	-0.123928
SPTA1	-0.123924
PCDHB19P	-0.123916
LCE1D	-0.123897
UPK1B	-0.123895
CSN2	-0.123878
SLC1A3	-0.123851
DEFB116	-0.123838
ADCYAP1R1	-0.123834
TCHH	-0.123816
RPTOR	-0.123783
MEG3	-0.123765
CPXM2	-0.123755
OR8B3	-0.123752
TAS1R2	-0.123744
SLC26A7	-0.123742
PTPRR	-0.123726
KHDRBS2	-0.123715
STAT3	-0.123704
CD37	-0.123696
CD44	-0.123676
HLA-DQA2	-0.123663
LINC00648	-0.12363
BVES-AS1	-0.123609
WFDC9	-0.123581
PPAT	-0.12358
C5orf20	-0.123571
NKAIN2	-0.123559
PIGQ	-0.123546
LINC01289	-0.123531
ADAM28	-0.123526
BPIFC	-0.123513
SLC34A2	-0.123507
FRMD6-AS2	-0.123472
KCNH5	-0.123466
C10orf40	-0.123454
LINC00298	-0.123428
OR2H1	-0.123427
LINC01221	-0.123416
LONRF2	-0.123409
NAV3	-0.123369
FXR2	-0.123355
CLNK	-0.123345
FLG-AS1	-0.123338
KIAA1328	-0.123335
TCHHL1	-0.123333
ADRA1D	-0.123309
ANTXR2	-0.123301
GABARAPL1	-0.123256
CHN1	-0.123237
SQRDL	-0.12323
KRT6C	-0.123158
DPPA3	-0.123145
LOC101927637	-0.123121
LOC101928298	-0.123083
PGLYRP4	-0.123083
FAT2	-0.123062
OR2K2	-0.123058
OR4N4	-0.123038
LOC101927394	-0.123027
TOLLIP	-0.122999
COA5	-0.122974
FOXF1	-0.1229
EPB41L4A	-0.122871
C12orf76	-0.122854
OR7G1	-0.122835
MS4A8B	-0.122827
PER4	-0.122809
PCDHB11	-0.122806
KRTAP4-7	-0.122806
C8orf37-AS1	-0.122795
LOC101929584	-0.122789
CNBD1	-0.122763
FLJ43950	-0.122751
MGAT4C	-0.122736
C1orf129	-0.122731
DOCK2	-0.122722
LINC00378	-0.12272
TACC2	-0.122708
HCN2	-0.122697
LINC01377	-0.122691
TCF4	-0.12268
LILRA1	-0.122649
GABRR3	-0.122646
ARHGAP15	-0.122646
OR6C3	-0.122591
LCE3B	-0.122569
LOC91948	-0.122549
LINC00618	-0.122547
ERP29	-0.122545
LINC00210	-0.122511
SIRPD	-0.122505
MIR2052HG	-0.122501
CDCA7	-0.122483
SLC44A3	-0.122476
LOC150568	-0.122463
CDYL2	-0.122455
TNFSF11	-0.122453
GABRP	-0.12245
IL1F10	-0.122438
SYCE1	-0.122364
FAM169B	-0.122358
DDX1	-0.122322
TAF4B	-0.122318
LINC01258	-0.122282
C22orf34	-0.122279
CCDC168	-0.122277
LTBP1	-0.122241
C7orf51	-0.122238
SERPINA9	-0.122229
EMX2OS	-0.122189
CD177	-0.122183
VN1R4	-0.12214
IFNA7	-0.122079
GALNTL6	-0.122077
PHF21A	-0.122068
DPP10	-0.122046
DSC1	-0.122034
MAPK15	-0.122027
HLA-DRB1	-0.122025
SLC25A21	-0.122003
OR6K6	-0.122001
ATP13A5	-0.121993
PIEZO2	-0.121972
FGD6	-0.121972
OPRM1	-0.121958
OR56A5	-0.121944
LOC100289650	-0.121929
MIR548F3	-0.121928
HS3ST5	-0.121887
SEMA4D	-0.121885
FAF1	-0.121883
KIRREL3	-0.121873
CCR3	-0.121866
CUBN	-0.121838
LOC101928223	-0.121814
PHKG2	-0.121813
GCM1	-0.121769
NTN1	-0.121769
CEACAM3	-0.121761
PYY	-0.121761
SH3RF3	-0.121759
VWC2	-0.121731
ISX	-0.121724
CYTIP	-0.121703
C16orf82	-0.121668
EPHA4	-0.121649
RNF222	-0.121648
OR13A1	-0.121645
LINC00922	-0.121607
CYP2B7P1	-0.121599
LCE2D	-0.121576
LOC100129461	-0.121573
PGK2	-0.121568
MAP7	-0.121554
LINC01510	-0.121549
A2BP1	-0.121542
KIAA0182	-0.121516
CYP4A22	-0.121509
LOC102724084	-0.121505
OR10G3	-0.121483
IFNW1	-0.121476
NMU	-0.121462
LARP4	-0.121453
C15orf42	-0.121427
COL21A1	-0.121426
ABT1	-0.1214
KIR2DL4	-0.121386
PDZK1IP1	-0.121356
ADGRF1	-0.121347
CR2	-0.121327
APBA2	-0.121318
LCE4A	-0.121315
OR8S1	-0.121306
SEMA6D	-0.121306
LINC00907	-0.121297
MUCL1	-0.121295
MLLT4	-0.121268
RETNLB	-0.121262
OR7A5	-0.121241
OR9Q1	-0.121222
IPCEF1	-0.121215
PRR5L	-0.121199
LRRC69	-0.121194
LINC00222	-0.121181
CHL1	-0.12118
LINC01107	-0.121179
RASGRP1	-0.121172
C7orf58	-0.121119
BAHCC1	-0.121118
DNALI1	-0.1211
ST8SIA6	-0.121093
UQCRC2	-0.121084
TPK1	-0.121076
HCG26	-0.121069
LOC643623	-0.121066
GRXCR1	-0.121055
ARL6IP4	-0.121031
ODAM	-0.121023
C3orf43	-0.121008
SLAMF6	-0.120967
ANKS6	-0.120966
CD3E	-0.120889
ZNF232	-0.120839
PRPF8	-0.120839
MLPH	-0.120829
LOC102724691	-0.120815
TMEM161B-AS1	-0.120805
TMEM2	-0.12079
LOC101927641	-0.120789
LASS2	-0.120787
OXR1	-0.120772
ANKRD26P3	-0.120767
ADAM33	-0.120749
FAM107B	-0.120729
SHISA6	-0.120728
PRKAR1B	-0.120724
ADAMTS2	-0.120693
FSCB	-0.120653
NOS1AP	-0.120645
NPPA	-0.120638
PERM1	-0.120627
C9orf92	-0.120624
BCAS4	-0.120595
ALX4	-0.120576
OSBPL10	-0.12056
AICDA	-0.120546
BSPH1	-0.120542
LOC101927592	-0.120541
LOC728276	-0.120527
ING2	-0.120494
TDRKH	-0.12049
FETUB	-0.120474
OR2T8	-0.120448
NLRP3	-0.120433
FAM81B	-0.120394
ARPC3	-0.12038
CSNK2A1	-0.120377
LOC101928280	-0.120341
OR11H4	-0.120334
LY86-AS1	-0.120331
A1CF	-0.120294
ACSM5	-0.120253
OR1F2P	-0.120223
CES8	-0.12021
CUGBP2	-0.120158
HK2	-0.120157
TMEM216	-0.120151
TRIML2	-0.120145
CLEC12B	-0.120137
LINC00598	-0.120127
TMEM244	-0.120114
KRT38	-0.120103
C10orf11	-0.120081
OR4L1	-0.119983
SON	-0.119966
C5orf45	-0.119943
LEF1-AS1	-0.119931
TMEM61	-0.119927
GOLPH3L	-0.119924
ZAK	-0.119891
LINC00571	-0.119853
LINC00299	-0.119829
KCNJ1	-0.119822
OR4C11	-0.119788
NAALADL2	-0.119778
MPZ	-0.119757
ARL15	-0.119751
C3	-0.119737
SGCD	-0.119731
MUC22	-0.119679
PRKCG	-0.119679
LOC285766	-0.119669
C6orf136	-0.119658
CPA6	-0.119652
KYNU	-0.119644
FBN2	-0.11964
KRT1	-0.11963
FYB	-0.119592
LINC00508	-0.119586
SNRNP35	-0.119582
TANK	-0.119565
LINC00619	-0.119532
ADAMTS16	-0.119531
SSX2IP	-0.119511
MYRFL	-0.119499
ARAP2	-0.119493
ATP6V1B1	-0.119462
MYO5C	-0.119459
IKZF1	-0.119455
OR6B2	-0.119423
PKD1L3	-0.119399
INPP4B	-0.119388
PRDM9	-0.119372
MUC21	-0.119347
BAT1	-0.119325
PART1	-0.119288
HECW1	-0.119284
UMOD	-0.119256
LINC01096	-0.119249
CTD-2194D22.4	-0.119223
PLAGL1	-0.119202
MROH2B	-0.119191
CHST15	-0.119178
CCNY	-0.119169
MAP1S	-0.119156
MPP7	-0.11914
LGI4	-0.119119
SDC1	-0.119117
LINC01505	-0.119112
FOLR4	-0.119102
MAS1L	-0.1191
NFYC	-0.119095
COL4A2	-0.119087
FCRL5	-0.119079
REG1A	-0.11907
PPP1R3B	-0.119054
LOC100506457	-0.119027
RASSF9	-0.119027
CDH10	-0.119025
PAX9	-0.119021
CLEC5A	-0.118998
LINC00944	-0.118997
RRAGD	-0.118983
C16orf78	-0.11898
FAM12A	-0.11895
APCS	-0.118945
CDH19	-0.118929
LINC00403	-0.118927
KRT37	-0.118902
ABCC2	-0.118875
MOG	-0.118874
OR2M3	-0.118869
FAM83B	-0.118867
LOC101928509	-0.118863
LIFR	-0.118861
SLC6A18	-0.118846
C6orf10	-0.118845
BMI1	-0.118836
DEPDC1B	-0.118833
PGS1	-0.11881
PCDHB8	-0.118776
PTPRB	-0.118699
FCRLB	-0.118696
ADAM7	-0.118671
LINC01246	-0.118658
HHLA1	-0.118646
CTAGE1	-0.11864
SLC14A2	-0.118638
PEX12	-0.118591
LOC730755	-0.118583
F11-AS1	-0.118582
LOC100128542	-0.11857
NLRP10	-0.11853
MIR1323	-0.1185
MAP1LC3B2	-0.118499
ADGRE1	-0.118498
SORBS2	-0.118479
C1orf52	-0.11847
GSDMC	-0.118466
SORCS1	-0.118465
NOTCH4	-0.118457
LOC100506393	-0.118439
C10orf90	-0.11837
PIK3R6	-0.118363
TSPAN8	-0.118358
LINC00353	-0.118297
SPATA19	-0.118272
OR2B3	-0.118255
DOK5	-0.118246
CD58	-0.118243
TGDS	-0.11824
OR2W1	-0.118235
SNAP47	-0.118221
CLIC6	-0.11821
VCAM1	-0.118168
CPAMD8	-0.118145
LINC01036	-0.118136
FOXP2	-0.118129
NWD1	-0.118127
RGS5	-0.11811
C5orf67	-0.118081
TEKT1	-0.118065
C2CD4A	-0.118055
PTH	-0.11803
SNRPB2	-0.118028
ADAM10	-0.118026
SERPINA1	-0.118025
CETN1	-0.11802
OR6N2	-0.118
CCNYL2	-0.117999
ADAMTSL3	-0.117932
CFHR1	-0.117916
OR6C2	-0.117912
MAD1L1	-0.117905
NLRP13	-0.117901
PUF60	-0.117898
TECTB	-0.117868
PYHIN1	-0.117866
EMCN	-0.117837
IL36B	-0.117831
MRPL18	-0.117806
LINC01448	-0.117804
ALKBH5	-0.117791
VIT	-0.117788
CD1E	-0.117781
TMEM132D	-0.117774
RNF144B	-0.11772
LINC00564	-0.117712
HHAT	-0.117692
GC	-0.117671
ZNF729	-0.11766
TRIM38	-0.117646
OR14J1	-0.117622
ZNF311	-0.117579
CLEC4M	-0.117569
FAM155A	-0.117528
EEFSEC	-0.117523
SPINT3	-0.117501
EGF	-0.117497
MTNR1A	-0.117496
C1orf101	-0.117476
FCER1A	-0.117459
NFATC1	-0.117444
CYP2C9	-0.117431
RASGRP3	-0.117421
PHLDB2	-0.117416
MUC16	-0.1174
FAM150A	-0.117377
CTLA4	-0.117361
CD53	-0.117352
TAL1	-0.11734
SIRPB1	-0.117336
GDPD4	-0.117321
OR7G3	-0.117258
ASIC2	-0.117255
MIIP	-0.117247
OR10J5	-0.117242
CFHR4	-0.117239
TRIM10	-0.11723
HEATR3	-0.11722
ST6GALNAC2	-0.117216
TTC6	-0.117182
CEACAM20	-0.117169
ANKZF1	-0.117139
LINC00558	-0.117138
LOC645323	-0.117123
OTOGL	-0.117123
ZNF48	-0.117079
LOC101927434	-0.117073
OR4K5	-0.117064
LOC101929106	-0.117063
LINC00967	-0.117052
NXN	-0.117038
LOC101927730	-0.117015
MGMT	-0.117006
LINC00276	-0.117002
CYP8B1	-0.116986
FGF23	-0.116984
LHPP	-0.116978
C10orf126	-0.116938
CCDC26	-0.116915
GCSAML	-0.116891
CCDC27	-0.116881
PRKCH	-0.116871
IL1RAP	-0.11686
NTN4	-0.116857
HP1BP3	-0.116829
ENOX1	-0.116816
SDR16C6P	-0.1168
FABP1	-0.1168
LYPD3	-0.116786
C10orf47	-0.116774
CDH17	-0.116735
CYP3A4	-0.116701
GZMH	-0.116695
PRR16	-0.116675
KRT73	-0.116672
RBM4B	-0.11665
MGAT1	-0.11664
TARID	-0.116638
EYA2	-0.116631
LINC01487	-0.116599
OR2G6	-0.116596
DRGX	-0.116586
LINC01446	-0.116585
TTYH1	-0.11658
SLAMF1	-0.116544
MUC7	-0.116521
GSTA2	-0.116511
LOC284825	-0.116485
CARD10	-0.116479
OR10P1	-0.116467
MGC32805	-0.11646
LOC102723448	-0.116445
FCER2	-0.116423
C8ORFK29	-0.116418
BCAT1	-0.116403
ITGA8	-0.116397
OR6M1	-0.116367
CYP3A43	-0.116346
TAS2R7	-0.116346
WDPCP	-0.11633
BDH2	-0.116314
GSG1	-0.116309
KRT33A	-0.116284
ADGRL2	-0.116282
UBA2	-0.116276
CTXN2	-0.11627
OR12D2	-0.116251
PABPC3	-0.116247
PREX2	-0.116237
WNT9A	-0.116222
UBN1	-0.116173
CCT8	-0.116172
FLCN	-0.116169
HKR1	-0.116136
PRICKLE4	-0.116134
RPS3	-0.116124
LINC01081	-0.116115
TAAR2	-0.116105
LOC105376360	-0.116093
LOC284788	-0.116092
AGBL5	-0.116081
ZSCAN2	-0.116078
SULT1B1	-0.116073
REM1	-0.116061
USP35	-0.116038
LINC00371	-0.116014
IL36G	-0.116002
MMP13	-0.115995
CSMD1	-0.11599
C7orf23	-0.11596
RHOH	-0.115956
ZNF280A	-0.115953
C21orf131	-0.115936
MSC-AS1	-0.115919
EBF1	-0.115916
MRPL42	-0.115909
NEUROD6	-0.115864
SGSH	-0.11586
OR1A1	-0.115852
BEYLA	-0.115851
KIR3DX1	-0.115817
SNX29	-0.115814
OR5AC2	-0.115811
FAM110B	-0.115801
FAS	-0.115795
ARSJ	-0.115776
GPR26	-0.115759
LOC643406	-0.115759
TINAG	-0.115746
EGFR	-0.115743
OLFM3	-0.115698
AHCYL1	-0.115696
KCNIP1	-0.11569
ARHGEF33	-0.11567
UNC13A	-0.115667
EFCAB4B	-0.11566
C18orf34	-0.115592
ATP1A4	-0.115587
OPTC	-0.115536
CCDC102B	-0.115524
DCUN1D1	-0.115524
TOP1	-0.115487
LOC149620	-0.11548
LCE2B	-0.115479
KCNC2	-0.115468
LINC00607	-0.115445
LOC101928012	-0.11539
ACSBG2	-0.11537
RAB40C	-0.115368
NOTCH2	-0.115366
SHROOM3	-0.115363
ABCD2	-0.115352
OR5H6	-0.11534
GJB2	-0.115327
OR2H2	-0.115326
ETS1	-0.115324
SYNDIG1	-0.115292
KCNMB4	-0.115287
LOC101927849	-0.11528
CCL20	-0.115242
SUDS3	-0.115216
ADAM12	-0.115215
ZIC4	-0.115214
UBE2E2	-0.115207
AQP10	-0.115206
LMBRD1	-0.1152
CDH6	-0.115181
ACOT7	-0.115173
C13orf18	-0.115173
C13orf28	-0.115165
TUBB2A	-0.115161
KCNK17	-0.115147
LOC101929681	-0.115145
BTBD10	-0.115095
LOC101928460	-0.115092
MFN1	-0.115078
AQP4	-0.115071
IRF6	-0.115069
MEI4	-0.11505
KRT27	-0.115038
LOC101927692	-0.115027
PRR25	-0.115026
LINC01611	-0.115021
GABRB1	-0.114965
IL36A	-0.114944
ASCL2	-0.114941
FABP5	-0.114937
AKR1C3	-0.114926
LOC339975	-0.114898
HSP90B3P	-0.114875
AFF3	-0.114839
SH3RF2	-0.114839
LOC100133469	-0.11477
LARP4B	-0.114767
FCGR3B	-0.114766
FBXW7	-0.114746
SNCAIP	-0.114743
CA12	-0.114735
AK3L1	-0.114707
CPN1	-0.114705
AMY2A	-0.114701
REG3G	-0.114692
C15orf54	-0.114687
KRT82	-0.114624
GYPC	-0.114601
WNT5B	-0.114585
PTCHD3	-0.11455
LOC102724096	-0.114546
ACSF2	-0.114545
REG1P	-0.114513
MIR548AC	-0.114487
KRT75	-0.114481
GFI1	-0.114465
LOC440563	-0.114452
LOC101929608	-0.11445
GP6	-0.114432
MIR370	-0.114422
TECRL	-0.114421
DEFB123	-0.114393
TM4SF1-AS1	-0.114393
RASGEF1C	-0.11437
GADL1	-0.114351
KRT5	-0.114347
CREB5	-0.114328
KCNJ8	-0.114304
HOXA4	-0.114232
TGFB3	-0.114229
NHSL1	-0.114181
RNASE1	-0.114171
ANO9	-0.114168
C12orf50	-0.114145
HOXA11	-0.114138
HDLBP	-0.114119
FLJ46321	-0.114118
ENTPD2	-0.114064
TMEM116	-0.114056
CHRM2	-0.114047
MYH4	-0.114044
CFI	-0.114044
HBG1	-0.114043
OSBPL1A	-0.114039
DDX43	-0.114037
ACTL8	-0.114036
MMP8	-0.113977
IL5RA	-0.113972
UGT2B28	-0.113952
SPINK2	-0.113941
LOC103312105	-0.113908
DDR1	-0.113907
COL29A1	-0.113883
TEC	-0.113857
ERN1	-0.113836
TERT	-0.113819
TLK1	-0.113803
LOC283999	-0.113781
SLC25A2	-0.113779
SYT6	-0.113778
C10orf128	-0.113776
CLMN	-0.113772
LOC148145	-0.113769
LINC00350	-0.113764
ALB	-0.113762
BAT2L2	-0.113758
CRISP3	-0.113757
FREM3	-0.113756
TSPAN32	-0.113738
AGBL1	-0.113725
TGFA	-0.113705
PRRX1	-0.113666
C3orf37	-0.113644
PCDH9	-0.113642
LOC100506403	-0.113633
CARD18	-0.113598
GLP2R	-0.113593
OR51B4	-0.113592
OR2T3	-0.113576
WDFY2	-0.113564
SLC45A4	-0.113553
ARHGEF15	-0.113552
IGLON5	-0.113535
C17orf61	-0.113529
C4orf31	-0.113526
SLC6A9	-0.113525
RNF103-CHMP3	-0.113497
THSD7B	-0.113495
RACGAP1P	-0.113487
OR5H1	-0.113474
PDIK1L	-0.113461
SLIT3	-0.113453
TMPRSS3	-0.11345
FCRLA	-0.113434
TRAPPC10	-0.113414
ABCA13	-0.113413
GALNTL1	-0.113403
CSN1S2B	-0.113395
FLJ36000	-0.113386
GALNT8	-0.113361
MYO16	-0.113342
KCNQ1DN	-0.113324
FAM170A	-0.113305
G6PC2	-0.113289
OR14I1	-0.113277
PAX2	-0.113258
FBXO5	-0.11325
ROS1	-0.113237
TTLL5	-0.113237
GDA	-0.113215
MRS2	-0.113205
HSPA1L	-0.113202
APOBEC1	-0.113165
OR1J4	-0.113157
TMOD3	-0.113127
NTF3	-0.113103
PRDM14	-0.1131
LCE2C	-0.113069
LINC01122	-0.113067
DAB1	-0.113047
CYP2F1	-0.113035
MSH5	-0.113031
RSU1	-0.113029
TAF1L	-0.113026
SLC17A2	-0.113025
PRSS50	-0.113005
SGK1	-0.112976
PCDHB5	-0.112974
PRRG2	-0.112955
OR10G9	-0.112902
PCK2	-0.112892
FAM227B	-0.112874
TCERG1	-0.112866
MLLT6	-0.112862
ROBO4	-0.112853
KRTAP2-3	-0.112832
ATP2A2	-0.112821
LOC101929210	-0.112821
TPRX1	-0.112818
CD86	-0.11281
KANK3	-0.112806
MARCO	-0.112738
AP3D1	-0.112725
ANKRD11	-0.112725
ASB18	-0.112724
PGCP	-0.112715
IL1F7	-0.112704
DLEU7	-0.112672
OR6T1	-0.112669
MRPL11	-0.11264
SLC17A4	-0.112621
KNDC1	-0.112617
KRT72	-0.11255
LINC00570	-0.112541
LINC01047	-0.112532
PPM1L	-0.11253
LOC256880	-0.112523
B3GNTL1	-0.112516
SLC7A10	-0.112512
OR5T3	-0.112511
NUP210L	-0.11248
CEACAM5	-0.112453
OR5W2	-0.112431
HNF4G	-0.112421
NCOA2	-0.112396
PRSS38	-0.112383
RNF138	-0.112376
ADH7	-0.112374
PALM	-0.112338
MGAT5	-0.112321
BBOX1	-0.112318
TRPM3	-0.112314
NF1P1	-0.11228
SSC5D	-0.11227
LINC00673	-0.112269
SPRR2B	-0.112236
WDR18	-0.11223
MS4A7	-0.112224
C20orf203	-0.112218
SNRPE	-0.112213
AADAC	-0.112213
NOP58	-0.112195
PCSK5	-0.112184
CAV1	-0.112178
MOSC2	-0.112171
LINC00928	-0.11217
MTERFD2	-0.112166
OR2T34	-0.112164
LINC01256	-0.112142
TRPV3	-0.112129
PLEKHG3	-0.11211
TRA2B	-0.112101
KRT34	-0.112089
PRB3	-0.11206
C9orf11	-0.11205
CYP2A13	-0.11203
IL18RAP	-0.112023
SNORD32B	-0.111948
SERPINE2	-0.111943
EIF3M	-0.111923
EPS8L1	-0.111908
GPX5	-0.111907
KCMF1	-0.11188
TBL1XR1	-0.111865
LOC285501	-0.111851
C4orf42	-0.11183
CARD11	-0.111825
FLT1	-0.111814
F7	-0.111814
OR4M1	-0.111795
HLA-DRB5	-0.111787
C7orf66	-0.111781
CCL4	-0.11178
CA6	-0.111771
LOC101929147	-0.111771
ADAMTS1	-0.111767
CNTNAP5	-0.111764
H1FNT	-0.111761
SFTA3	-0.111742
WWTR1	-0.111737
IDO2	-0.111725
C4orf35	-0.111704
C7orf71	-0.111692
PGM5	-0.111689
GOLGA3	-0.111683
PAMR1	-0.111683
PLBD1	-0.111676
TRIM60	-0.111674
MIR124-2	-0.111655
ANKRD55	-0.11164
OR10K2	-0.11164
CRADD	-0.111639
DDAH1	-0.111629
CLTC	-0.111621
POTEH	-0.111618
SYNE3	-0.111572
OR7C2	-0.111513
C6	-0.111477
OSMR	-0.111469
MGC34034	-0.111468
OR1N1	-0.11145
VNN2	-0.111428
CHD3	-0.111416
WFDC8	-0.111402
NOL4	-0.111398
C9	-0.111394
PSMA8	-0.111391
LOC93432	-0.111391
SDHB	-0.111373
LOC100133286	-0.111348
THPO	-0.111344
LOC100130015	-0.11134
MRPS28	-0.111323
FZD7	-0.111294
PMEPA1	-0.111274
OR52N2	-0.111273
C1orf87	-0.111246
CD300LB	-0.111236
GPNMB	-0.111235
FLNB	-0.111229
CACNA1E	-0.111219
KRTAP5-6	-0.111219
SPRYD5	-0.111208
TBCB	-0.111203
XYLT1	-0.111183
ETF1	-0.111172
OR1B1	-0.111164
AHSP	-0.111156
TM9SF1	-0.111136
FHIT	-0.111114
TWIST1	-0.111113
ACCN1	-0.111101
RPL26L1	-0.111068
SEMA5A	-0.111066
STAU2	-0.111065
TMEM241	-0.111065
HOXA3	-0.111063
DAOA	-0.111043
MIR4280	-0.111035
ADIPOQ	-0.111035
CUL1	-0.111011
LOC101929284	-0.111007
RHCG	-0.111006
SLC22A24	-0.111001
FGFR2	-0.110992
SLC10A4	-0.110987
BRIP1	-0.110979
C10orf76	-0.110971
COL4A1	-0.110968
DNAI2	-0.110966
DEFA5	-0.110954
CSMD2	-0.110953
SC65	-0.110949
SERPINA12	-0.110932
ATP4A	-0.110929
STPG2	-0.110919
ZNF703	-0.110912
PNPLA2	-0.110885
OR2M5	-0.110881
NCRNA00032	-0.110798
MECOM	-0.110797
PMP2	-0.110787
SLC9C2	-0.110782
LOC101927237	-0.11078
ADAMTS6	-0.110768
DSG1	-0.11076
ADHFE1	-0.110739
LINC00989	-0.11071
RNLS	-0.110706
CSTA	-0.110668
KIAA1211	-0.110661
FCGR3A	-0.110643
ZNF131	-0.110621
GATA4	-0.110614
UCN3	-0.110603
LASS3	-0.110597
OR4F13P	-0.110593
C17orf101	-0.110546
B4GALNT2	-0.11054
MMP19	-0.110512
KRTAP9-1	-0.110502
DNAH11	-0.110502
D21S2088E	-0.110497
FRG2DP	-0.110472
CEACAM18	-0.110464
[truncated: 1,331 more rows]
