# Supplementary material for: Integrated analysis of DNA methylation and mRNA expression profiles to identify key genes involved in the regrowth of clinically non-functioning pituitary adenoma
Source: Aging (Albany NY). 2020 Feb 3;12(3):2408–27. doi: 10.18632/aging.102751 (PMC7041752; doi:10.18632/aging.102751)
Supplement: Supplementary Table 3 [file aging-12-102751-s004..xlsx]

## Sheet: Sheet1
Supplement Table 3 Differentially expressed genes
Gene	FoldChange	Log2FoldChange	P value
PCDH11Y	0.127915	-2.96674	0.00435302
RSPO3	0.307713	-1.70034	0.00315787
ISL1	0.316369	-1.66032	0.0447578
DLGAP1	0.318461	-1.65081	0.0224238
BPIFA1	0.324055	-1.62569	0.00465101
IL20RA	0.327077	-1.6123	4.73e-05
CCL2	0.344964	-1.53548	0.0017853
SCGB3A1	0.346611	-1.52861	0.000725061
SLC44A5	0.347499	-1.52492	0.0351466
CXCL17	0.352257	-1.5053	0.002845
TOX3	0.354379	-1.49663	0.0474509
F2RL2	0.35466	-1.49549	0.000880166
AQP5	0.367645	-1.44361	0.0106125
SLPI	0.368058	-1.44199	0.00364761
MIR205HG	0.368136	-1.44169	0.00169818
CH25H	0.371481	-1.42864	0.00265643
ALOX15	0.372119	-1.42616	0.0115314
CDH12	0.379065	-1.39948	0.00588176
AKR1C1	0.380255	-1.39496	0.00458833
SCGB1A1	0.384539	-1.3788	0.0238107
FSIP2	0.390121	-1.35801	0.000818549
FCN1	0.390364	-1.35711	0.000179539
EGR3	0.391386	-1.35333	0.000725592
RHOV	0.392331	-1.34986	0.0043339
CPXM2	0.393027	-1.3473	0.000549772
KRT15	0.394622	-1.34146	0.000138107
TNS4	0.396408	-1.33494	7.65e-05
ID3	0.39716	-1.33221	0.000427069
SELE	0.397392	-1.33137	8.18e-05
EGR2	0.399683	-1.32307	0.00956071
ADAMTS2	0.403082	-1.31085	0.00449166
PDGFRA	0.404928	-1.30426	0.000764368
SERPINB3	0.409305	-1.28875	0.00782163
PRSS8	0.409577	-1.28779	0.00521407
BCHE	0.41036	-1.28504	0.0170944
LCN2	0.412396	-1.2779	0.00583661
CLIC6	0.412867	-1.27625	0.0210926
LIN28B	0.4184	-1.25705	0.0094906
BPIFB1	0.420561	-1.24961	0.000526931
KLK11	0.422434	-1.2432	0.0411017
LGALS3	0.422775	-1.24204	0.000910974
UNC5C	0.423857	-1.23835	0.0150685
C11orf88	0.437308	-1.19328	0.0128923
TNF	0.437912	-1.19129	0.0125433
ID1	0.438597	-1.18903	0.000730904
SNTN	0.440543	-1.18265	0.00325242
PAX9	0.440807	-1.18178	0.000784553
CAPN13	0.441159	-1.18063	0.014983
LONRF3	0.441986	-1.17793	0.00326198
COL4A6	0.443113	-1.17425	0.0338404
SOX2	0.445842	-1.1654	0.0223244
KCNK5	0.446157	-1.16438	0.00291352
BPIFB4	0.447045	-1.16151	0.0101084
ANXA1	0.453942	-1.13942	0.000290024
BMP4	0.456903	-1.13004	0.00558695
ALDH3B1	0.458883	-1.1238	0.00255073
HSPB2	0.459382	-1.12223	0.00029268
FZD7	0.462459	-1.1126	0.000225752
KRT5	0.462746	-1.11171	0.0101424
FOSB	0.466194	-1.101	0.0467391
CHI3L1	0.46741	-1.09724	0.0249299
CCDC170	0.468198	-1.09481	0.0145379
FAM189A1	0.468481	-1.09394	0.0483363
TACSTD2	0.46854	-1.09376	0.0184962
NPY	0.470329	-1.08826	0.00120525
EGR4	0.472287	-1.08226	0.0450398
LAMB3	0.472541	-1.08149	0.00036014
MMP1	0.475519	-1.07243	0.0369425
MUC15	0.475714	-1.07183	0.0447068
WDR86	0.475957	-1.0711	0.0115882
SCARA3	0.476028	-1.07088	0.000105174
SERPINB4	0.47697	-1.06803	0.00259428
CDHR4	0.477176	-1.06741	0.013151
S100A9	0.47848	-1.06347	0.0189961
PROSER2	0.479109	-1.06158	0.0312483
C3orf36	0.479959	-1.05902	0.000501965
PRRX2	0.480386	-1.05773	0.00206948
GABRP	0.480889	-1.05623	0.000450441
F2RL1	0.480917	-1.05614	0.0208472
MATN3	0.482234	-1.05219	0.00649527
CFAP45	0.48242	-1.05164	0.0295485
BHLHE40	0.482764	-1.05061	0.00124349
MSMB	0.483661	-1.04793	0.00869648
LDLRAD1	0.484302	-1.04602	0.00106183
AKAP14	0.487291	-1.03714	0.0221991
KIAA2012	0.48804	-1.03493	0.00768246
IER3	0.488874	-1.03247	0.00438914
DNAH3	0.489762	-1.02985	0.000824923
PVRL4	0.490223	-1.02849	0.00110379
COMP	0.491773	-1.02394	0.00140232
DEFB1	0.493104	-1.02003	0.0177404
SLC25A43	0.493295	-1.01948	0.00602783
CRYAB	0.493884	-1.01776	0.0067837
DCN	0.49426	-1.01666	0.00348826
CYBRD1	0.495836	-1.01207	0.000970466
GSTM5	0.496411	-1.01039	0.000470095
TBX3	0.496694	-1.00957	0.0197594
PIGR	0.497682	-1.0067	0.00171784
TNFRSF11A	0.499376	-1.0018	0.0180819
THBS4	0.500195	-0.999437	0.0121561
VASN	0.500442	-0.998724	0.00018007
TWIST1	0.500533	-0.998462	0.0232954
PLS3	0.500768	-0.997785	0.00330978
LRG1	0.502203	-0.993658	0.00328694
ZFP36L1	0.502494	-0.992822	0.000336768
AGR3	0.502749	-0.992091	0.0430883
KRT4	0.502998	-0.991376	0.0094497
KLF4	0.503008	-0.991347	0.00770318
ERBB3	0.503449	-0.990082	0.0141937
TRPV4	0.504913	-0.985894	0.00673218
PCDH17	0.505509	-0.98419	0.0263545
CSMD3	0.506061	-0.982616	0.037155
WIF1	0.506167	-0.982314	0.0312488
AQP3	0.506593	-0.981102	0.00233294
ZNF311	0.507534	-0.978423	0.00118135
FMO1	0.508591	-0.975422	0.024813
FAM3B	0.510105	-0.971135	0.0036848
PROK2	0.510356	-0.970425	0.0174992
ITLN1	0.511029	-0.968522	0.0110161
TMC5	0.512062	-0.96561	0.0228785
CX3CR1	0.512733	-0.96372	0.0265803
STAT6	0.51316	-0.962519	7.17e-05
MRGPRF	0.513672	-0.961081	0.0119999
HLX	0.513871	-0.960523	0.00040954
FAM46B	0.51394	-0.960329	0.00441623
MFAP5	0.515093	-0.957095	0.000190163
SLC51A	0.516366	-0.953533	0.0022522
SEC14L3	0.516717	-0.952554	0.0147588
AKR1C3	0.517741	-0.949697	0.0072044
SELENBP1	0.518899	-0.946473	0.00092266
MNDA	0.519367	-0.945173	0.0125614
RIPK4	0.519845	-0.943848	0.0449533
EPHX3	0.520189	-0.942893	0.00424572
RARRES1	0.521215	-0.940049	0.00251354
LHX6	0.521772	-0.938508	0.00711782
ERN2	0.524171	-0.931889	0.00852013
XCL1	0.526177	-0.92638	2.28e-05
EFEMP2	0.526586	-0.925259	0.0102985
SLC45A3	0.526798	-0.924677	0.0111314
PNPLA3	0.526963	-0.924226	0.0205163
SATB2	0.527503	-0.92275	0.00358865
APOBEC3A	0.529054	-0.918512	0.02529
ITGB4	0.52997	-0.916018	0.000934346
VSIG2	0.530064	-0.91576	0.0013067
PLK4	0.530655	-0.914153	0.0252385
SOX18	0.531631	-0.911502	0.000488686
IFNL2	0.531674	-0.911387	0.0157006
IL1B	0.531978	-0.910561	0.0214931
ANPEP	0.533483	-0.906486	0.00226283
EVX1	0.533837	-0.90553	0.0372952
RARG	0.534108	-0.904797	0.00121109
COL4A5	0.534424	-0.903943	0.0314453
GPRC5C	0.534479	-0.903796	0.000142887
NRARP	0.536061	-0.899531	0.00303145
MPZL2	0.536273	-0.89896	0.0281085
GLI1	0.536401	-0.898616	0.020281
MMP10	0.536931	-0.897191	0.00193509
NXN	0.537303	-0.896193	0.00377191
S100A11	0.538061	-0.894157	0.00727133
NTN4	0.538095	-0.894068	0.00128227
LFNG	0.5382	-0.893785	0.00240625
GJA1	0.538643	-0.892599	0.018663
CT45A7	0.5388	-0.892179	0.038876
PZP	0.539948	-0.889107	0.000530118
GSTA1	0.539975	-0.889036	0.0109301
C1orf106	0.539984	-0.88901	0.00681929
COL15A1	0.541277	-0.88556	0.00636354
AGTR1	0.541541	-0.884859	0.0161091
NHSL1	0.541584	-0.884743	0.000452034
VTCN1	0.542306	-0.882822	0.0146154
TNC	0.542795	-0.88152	0.0132067
IER2	0.542867	-0.881328	0.000105174
TNNT2	0.543804	-0.878842	0.0230564
IER5L	0.543872	-0.878662	0.00885371
VGLL3	0.543944	-0.87847	0.0143249
TMEM98	0.545688	-0.873852	0.00569107
SLCO2A1	0.546062	-0.872864	0.00170721
SPRR2A	0.546076	-0.872826	0.0282227
SELP	0.546077	-0.872824	0.00408796
CA4	0.546915	-0.870612	0.0470838
ANGPTL4	0.548127	-0.867417	0.013637
CCDC88C	0.548952	-0.865249	0.0101466
VNN3	0.549597	-0.863555	0.02833
TSPAN11	0.54969	-0.86331	0.0097769
NKX3-2	0.549866	-0.862849	0.0158255
IL6	0.550304	-0.861699	0.0402725
PPAP2C	0.552823	-0.855111	0.0320376
ZNF608	0.553143	-0.854277	0.0339026
SCN11A	0.554557	-0.850593	0.00102358
SLC51B	0.555837	-0.847267	0.0226065
NTF4	0.556051	-0.846711	0.0283608
COL8A1	0.556543	-0.845436	0.0347557
ALDH3A1	0.558502	-0.840366	0.00557314
CT45A4	0.559437	-0.837953	0.00988845
HNMT	0.560053	-0.836365	0.0193605
TRIP6	0.560178	-0.836043	0.000547116
S100A8	0.56043	-0.835394	0.0425088
TNFRSF10D	0.561373	-0.832968	0.000520557
YAP1	0.562396	-0.830343	0.000466907
FOXP2	0.563199	-0.828282	0.000707532
NFIB	0.563445	-0.827654	0.000530118
PTH1R	0.565002	-0.823672	0.00605068
EMP1	0.565209	-0.823144	0.00209391
S100A4	0.565668	-0.821974	0.0172947
PPP1R14D	0.56734	-0.817714	0.0283624
CBLC	0.56774	-0.816698	0.00634973
GPX8	0.569219	-0.812945	0.00672155
STXBP2	0.569674	-0.811792	0.0330989
CCL8	0.570318	-0.810162	0.0287045
MALL	0.570388	-0.809983	0.00116116
CFB	0.570618	-0.809402	0.0146792
ANKRD35	0.570962	-0.808535	0.00429831
ITGA8	0.57099	-0.808464	0.0312403
ALPK1	0.572242	-0.805304	0.00802029
FRRS1	0.573976	-0.800938	0.0184224
JUNB	0.574901	-0.798616	0.00334644
TREML1	0.575151	-0.797987	0.00624509
PTGER4	0.575639	-0.796765	0.0117412
CDC42EP1	0.577057	-0.793214	0.00184957
SOX8	0.577559	-0.79196	0.00502762
SLC7A2	0.577779	-0.791412	0.0220992
EGFLAM	0.578389	-0.789888	0.0273834
NKAIN2	0.57904	-0.788264	0.0112711
LYPD3	0.57973	-0.786548	0.00480612
TMEM119	0.579884	-0.786164	0.00355731
SHROOM4	0.581502	-0.782143	0.00260491
LPAR1	0.581867	-0.781238	0.00407043
ATF3	0.581909	-0.781135	0.0492186
LGI4	0.583041	-0.778331	0.000228939
LAG3	0.583557	-0.777055	0.00634973
TMEM133	0.583827	-0.776388	0.0298529
RHBDF1	0.584061	-0.775809	0.00166259
DLX5	0.585311	-0.772725	0.0121863
PCOLCE	0.585326	-0.772687	0.00890418
C6	0.585708	-0.771747	0.00492085
MMP14	0.58574	-0.771668	0.00728195
NRN1	0.585879	-0.771325	0.0265537
ISLR	0.587047	-0.768451	0.0124626
SCNN1B	0.588449	-0.76501	0.00906884
PDZRN3	0.588784	-0.76419	0.0391012
S100A14	0.590132	-0.76089	0.0104775
VIM	0.590301	-0.760476	0.00330075
NOTCH2	0.590565	-0.759832	0.00673696
SPEF2	0.591485	-0.757586	0.0158138
NTF3	0.59207	-0.756161	0.0263407
ALX1	0.592651	-0.754744	0.037973
LILRA2	0.592968	-0.753973	0.0178795
OTC	0.593004	-0.753886	0.00646818
FAM132B	0.593246	-0.753297	0.047768
TFPI	0.593278	-0.753219	0.0191225
LRRC32	0.593594	-0.752451	0.00803463
CLEC2L	0.593639	-0.752342	0.0455407
LPAR6	0.593904	-0.751698	0.00107298
MFSD7	0.594099	-0.751224	0.000351641
FGF17	0.594973	-0.749104	0.00875066
BBC3	0.595193	-0.748571	0.00280994
OPN1MW	0.595977	-0.746673	0.00198343
NEURL3	0.597043	-0.744094	0.02172
LRRC15	0.597524	-0.742932	0.019234
GLI3	0.598264	-0.741145	0.00815043
MMP13	0.598301	-0.741056	0.00872304
HTR3B	0.598927	-0.739549	0.04109
SVOPL	0.598998	-0.739377	0.0229156
SEMA3B	0.600438	-0.735913	0.00267502
SERTAD2	0.601157	-0.734185	0.0195963
HCAR2	0.602394	-0.731221	0.0034787
HEY2	0.602538	-0.730876	0.00508765
DKK3	0.602653	-0.7306	0.03299
DCDC2B	0.602739	-0.730395	0.0354674
ANKFN1	0.602843	-0.730146	0.0246754
SLITRK6	0.604325	-0.726604	0.0418703
DNAH10	0.60566	-0.72342	0.0178933
BGN	0.605834	-0.723004	0.00456178
KIAA1462	0.605879	-0.722898	0.00199777
ZP4	0.605972	-0.722677	0.0186843
IFITM2	0.606723	-0.720891	0.00464039
RAB34	0.607273	-0.719584	0.000539679
VIT	0.607329	-0.71945	0.00820727
TNFAIP8L1	0.607343	-0.719417	0.00436205
IL33	0.607449	-0.719166	0.0237501
CCL16	0.607826	-0.71827	0.00182142
LCN6	0.607923	-0.718039	0.00419048
KDR	0.608614	-0.716401	0.0486853
LIMS2	0.608667	-0.716275	0.00108201
KRT79	0.608954	-0.715595	0.0484144
MLXIPL	0.610342	-0.712309	0.00992564
TPSB2	0.610554	-0.711809	0.0261771
COL26A1	0.610687	-0.711495	0.0367481
BNC2	0.610906	-0.710977	0.0199687
NOTCH1	0.611915	-0.708598	0.00380697
CRISPLD2	0.612482	-0.707261	0.0062079
WWTR1	0.613004	-0.706033	0.00248911
FOXS1	0.613766	-0.70424	0.0184442
IGFBP6	0.613768	-0.704235	0.0253208
VILL	0.613946	-0.703816	0.047734
MYOCD	0.613961	-0.703782	0.0259498
FZD9	0.614103	-0.703447	0.0399697
PTRF	0.614831	-0.701739	0.00155901
LIPH	0.615411	-0.700377	0.028561
ARHGAP25	0.615574	-0.699997	0.00904441
SLC16A5	0.615809	-0.699444	0.0428285
HEY1	0.615854	-0.699341	0.0149745
TIMP3	0.616291	-0.698315	0.0386657
CCDC42B	0.617407	-0.695706	0.0223207
AHNAK	0.61953	-0.690753	0.0167911
NFATC1	0.619697	-0.690365	0.041585
AHNAK2	0.620151	-0.689308	0.0304207
RRAD	0.620445	-0.688624	0.0124078
SOWAHD	0.620604	-0.688256	0.0470881
IFI27	0.620988	-0.687362	0.0201126
ZNF385C	0.621397	-0.686414	0.0245464
CCDC3	0.621503	-0.686166	0.0125167
ACTA2	0.621738	-0.685621	0.0211553
IGFBP4	0.621861	-0.685337	0.003552
FAM180A	0.622354	-0.684192	0.003586
WTIP	0.622954	-0.682803	0.000705939
COL16A1	0.623348	-0.681891	0.0433491
BDH2	0.623641	-0.681211	0.026227
LRAT	0.624026	-0.680321	0.0297116
PLA2G10	0.62438	-0.679505	0.00821364
CRP	0.625378	-0.6772	0.0199803
ACSBG1	0.625856	-0.676098	0.0265611
OR52E8	0.626448	-0.674733	0.0487204
MRC2	0.626806	-0.67391	0.0157197
CSF2RB	0.62696	-0.673555	0.0283459
HAAO	0.627174	-0.673063	0.000662382
LMO2	0.62797	-0.671232	0.00081908
RNASE1	0.629391	-0.66797	0.00417614
SHE	0.629735	-0.667183	0.011482
TNFRSF10A	0.630442	-0.665565	0.00835918
PEAR1	0.630516	-0.665396	0.0293642
DDAH2	0.630714	-0.664942	0.000367577
CLEC3B	0.631069	-0.664129	0.0026405
PLEK2	0.631583	-0.662957	0.0175996
TM4SF19	0.631935	-0.662152	0.021729
FAM90A1	0.632156	-0.661648	0.024745
FGF11	0.632703	-0.660399	0.00303198
TBXA2R	0.632882	-0.659991	0.00346064
ADGRE2	0.633411	-0.658787	0.0111909
FAM110D	0.633602	-0.658351	0.00295814
GSTA5	0.63365	-0.658241	0.00486827
SERTAD1	0.633769	-0.65797	0.000697971
ITPKB	0.634027	-0.657383	0.0146808
CDH13	0.634123	-0.657166	0.0062488
BST2	0.634288	-0.65679	0.0161234
GGT5	0.634377	-0.656588	0.043543
RBP7	0.635166	-0.654795	0.00344364
ECM2	0.635451	-0.654148	0.00596993
IFITM1	0.635463	-0.654121	0.0301726
TP63	0.635643	-0.653711	0.0109965
LILRB3	0.635678	-0.653631	0.0377882
ACTR3C	0.636473	-0.651829	0.0240827
SLC6A20	0.636579	-0.651588	0.00220068
ANXA8	0.63671	-0.651293	0.0309577
PRKCDBP	0.63675	-0.6512	0.00195846
BCL6B	0.63728	-0.65	0.00565654
SOX10	0.638245	-0.647817	0.0264422
TCF7L1	0.638539	-0.647154	0.00242006
ADGRA2	0.638979	-0.64616	0.0102486
FXYD3	0.639694	-0.644547	0.0141591
CHRM3	0.639938	-0.643996	0.0448337
PTGES	0.640217	-0.643367	0.0482535
CDH9	0.640487	-0.642758	0.00882184
VIP	0.641207	-0.641137	0.0415702
GSTA2	0.642144	-0.63903	0.0160687
CXCL12	0.64257	-0.638075	0.017359
GIMAP1	0.642818	-0.637517	0.00431425
TNFSF10	0.642949	-0.637223	0.0187199
CLEC2B	0.643258	-0.63653	0.0252316
NLRP1	0.644923	-0.632801	0.00463933
CD34	0.645118	-0.632364	0.00572453
PQLC3	0.645717	-0.631025	0.0023425
ITGB3	0.64585	-0.630728	0.0385823
CYB5R2	0.646247	-0.629842	0.00313556
LRFN4	0.646873	-0.628446	0.0210023
FOXJ1	0.647605	-0.626814	0.00188357
HES4	0.648263	-0.62535	0.0221667
CDA	0.648359	-0.625134	0.0212844
TOR4A	0.64836	-0.625133	0.00718421
DNASE1L3	0.649159	-0.623356	0.0229661
SVEP1	0.649348	-0.622937	0.00643737
REP15	0.649852	-0.621817	0.0344895
GNG11	0.649875	-0.621766	0.00786465
GIMAP8	0.650042	-0.621395	0.000680973
CRYBG3	0.650133	-0.621194	0.00239084
EFEMP1	0.650292	-0.620841	0.000893445
PLVAP	0.650426	-0.620544	0.00472485
TNFAIP2	0.650738	-0.619851	0.0259875
CCL11	0.650907	-0.619477	0.0414878
EHD2	0.651175	-0.618883	0.00139116
NR2F1	0.651198	-0.618832	0.0113508
TFAP2B	0.651235	-0.61875	0.0358249
OSBPL10	0.651905	-0.617267	0.0471237
KANK3	0.652286	-0.616423	0.00101137
RASSF9	0.652392	-0.616189	0.00142091
SULT1E1	0.652495	-0.615961	0.00142728
S100A16	0.652524	-0.615898	0.00559014
TRIM72	0.653253	-0.614285	0.025093
CSF3R	0.653581	-0.613562	0.0461612
CFHR1	0.65409	-0.612439	0.0331966
NPR1	0.654176	-0.61225	0.0259322
MSLN	0.654227	-0.612136	0.00240997
CARD6	0.654674	-0.611151	0.0186311
GJB3	0.65512	-0.610169	0.00420907
SNTB1	0.655446	-0.609451	0.0358738
COL6A2	0.656411	-0.607328	0.0107086
GIMAP7	0.656702	-0.60669	0.00176724
EFHD1	0.657018	-0.605995	0.00370339
CAV1	0.658234	-0.603327	0.00525497
FCGR3B	0.658427	-0.602906	0.041653
HSPA12B	0.658517	-0.602708	0.0086099
ZIC4	0.658701	-0.602303	0.0189653
ATHL1	0.658722	-0.602258	0.0212355
ELK3	0.658945	-0.60177	0.0216791
WWC1	0.659165	-0.601288	0.0260794
TBX15	0.659968	-0.599533	0.0247333
FXYD5	0.659991	-0.599482	0.0119266
FAS	0.660319	-0.598765	0.00336503
CCDC102A	0.660508	-0.598353	0.0081345
ETS2	0.661058	-0.597152	0.00834697
IFITM3	0.661649	-0.595861	0.00913896
CYP4B1	0.662039	-0.595013	0.0131717
FMO4	0.662354	-0.594325	0.0141751
UST	0.662434	-0.594151	0.0113434
SYNPO2	0.662696	-0.593582	0.0199947
GFRA3	0.662981	-0.592961	0.0492101
NFKBIZ	0.663099	-0.592704	0.0336742
PYCARD	0.663587	-0.591642	0.00351429
SERPINE2	0.663709	-0.591378	0.0388457
GPR161	0.664246	-0.590211	0.0424769
SOD3	0.664302	-0.59009	0.0200919
CXorf21	0.665309	-0.587904	0.0267476
PMEPA1	0.66552	-0.587447	0.016448
KCNN4	0.665563	-0.587352	0.00163444
PCDH12	0.665682	-0.587096	0.00687454
DYSF	0.665879	-0.586669	0.0153437
DAW1	0.666234	-0.585898	0.00760332
KRTAP2-4	0.666343	-0.585663	0.00289706
GNAI1	1.50814	0.592767	0.0231462
ERN1	1.52067	0.604712	0.00888718
ERVV-1	1.52424	0.608089	0.022257
NDN	1.52727	0.61096	0.012104
KIF20A	1.52946	0.613019	0.0188835
SESN1	1.53678	0.61991	0.000424413
ZNF189	1.54696	0.629437	0.0210443
C17orf58	1.54747	0.629908	0.041789
IRS2	1.5557	0.63756	0.00285828
RNF150	1.55857	0.640227	0.0134389
ATP2B2	1.57317	0.653675	0.00862849
GJD2	1.58133	0.661137	0.0216217
PTCHD2	1.58407	0.663634	0.0236843
ARID5B	1.58724	0.666521	0.0423202
SP100	1.5925	0.671298	0.0413731
TM7SF3	1.59341	0.672117	0.000249124
USP31	1.59545	0.673965	0.00473175
RTKN2	1.60818	0.685432	0.0185451
BTBD11	1.60846	0.685679	0.0154674
KIAA2022	1.61542	0.691908	0.0013083
RCN1	1.62379	0.699366	0.0139042
ZP2	1.63055	0.70536	0.0447907
CDC42EP4	1.63928	0.713064	0.0115564
GLRB	1.64057	0.714194	0.0135419
NOX1	1.65377	0.725758	0.0346473
FAM174B	1.65451	0.726405	0.0176984
ERRFI1	1.65542	0.7272	0.0359561
TUBA3E	1.65983	0.731037	0.0195049
ELOVL6	1.67002	0.739863	0.000367046
DCLK3	1.67299	0.742431	0.0421683
ASPM	1.67479	0.743981	0.00825189
TRIB1	1.67572	0.74478	0.0425932
SCD5	1.68457	0.752378	0.0157856
NFKBIA	1.69116	0.758015	0.0119792
KCNJ4	1.70938	0.773477	0.0302348
SH3GL2	1.71624	0.779254	0.019335
MYT1L	1.71997	0.782383	0.00526984
UNC5A	1.72533	0.786871	0.0432195
C1orf94	1.74677	0.804692	0.0147461
SHISA7	1.75551	0.811887	0.0265155
FABP1	1.78	0.831878	0.0363896
CSAG1	1.78034	0.83215	0.0274535
XK	1.7945	0.843578	0.0110507
NELL2	1.81263	0.858087	0.00648996
NAALAD2	1.81375	0.858972	0.0078774
KCNK1	1.84645	0.884751	0.0213795
DEPDC1B	1.85936	0.894803	0.00136513
CITED2	1.88273	0.912828	0.000762775
VLDLR	1.8869	0.916015	0.000183788
ING2	1.88858	0.917298	0.00420004
VWA5B1	1.90185	0.927406	0.000240093
MAGEA12	1.94438	0.959307	0.0471555
CADM2	1.98728	0.990798	0.00549506
STAC2	2.02258	1.0162	0.0451875
SFRP5	2.04864	1.03467	0.0172772
RGS2	2.08223	1.05813	0.0345076
SIAH3	2.11651	1.08169	0.0292016
RHBDL3	2.18351	1.12665	0.00917667
FKBP5	2.244	1.16607	0.0224679
NEIL3	2.30918	1.20738	7.12e-05
43535	2.32093	1.2147	0.0313455
MYBPHL	2.65069	1.40637	0.0450282
C11orf87	2.87931	1.52572	0.0215787
