# Supplementary material for: Integrated analysis of DNA methylation and mRNA expression profiles to identify key genes involved in the regrowth of clinically non-functioning pituitary adenoma
Source: Aging (Albany NY). 2020 Feb 3;12(3):2408–27. doi: 10.18632/aging.102751 (PMC7041752; doi:10.18632/aging.102751)
Supplement: Supplementary Table 4 [file aging-12-102751-s001..xlsx]

## Sheet: Sheet1
Supplement Table 4 Pearson analyses
Gene	P value	R
MYT1L	8.89e-15	-0.764255
FAM90A1	1.56e-11	-0.696336
USP31	5.98e-08	-0.590436
ERN1	1.6e-07	-0.574682
STAT6	1.04e-05	-0.49691
PYCARD	1.44e-05	-0.49011
ETS2	1.49e-05	-0.489351
HEY1	4.37e-05	-0.465147
KCNK1	0.0002867	-0.417984
ING2	0.00147841	-0.370328
CYBRD1	0.00322491	-0.344888
MMP14	0.0386133	-0.24604
SH3GL2	0.0480593	-0.235478
ZP2	0.111722	-0.190406
C11orf88	0.157349	-0.169608
COMP	0.317145	-0.120424
RHBDF1	0.33402	-0.116324
KANK3	0.451286	-0.0908242
DEPDC1B	0.459138	-0.0892623
FABP1	0.615432	-0.0606376
TNC	0.683514	-0.0492262
VTCN1	0.757598	-0.0372773
EGR3	0.852127	-0.0225191
MYOCD	0.996357	0.000551608
ARID5B	0.958845	0.00623478
LILRA2	0.812421	0.0286659
S100A8	0.801869	0.030311
WWTR1	0.699167	0.0466659
GSTA2	0.603037	0.0627704
MNDA	0.583623	0.0661504
KRT5	0.544	0.0732138
CDH13	0.539728	0.0739898
SPEF2	0.46633	0.0878446
MMP13	0.388265	0.103959
SLC6A20	0.36068	0.110104
GSTA1	0.358398	0.110625
NTF3	0.32797	0.117778
BDH2	0.207805	0.151313
CCL16	0.182616	0.159987
CRP	0.16604	0.166178
WIF1	0.158603	0.169105
FZD7	0.152603	0.171541
EFHD1	0.130508	0.181181
PZP	0.120272	0.186071
OR52E8	0.113676	0.189393
S100A16	0.108451	0.192132
GIMAP7	0.106808	0.193015
NFATC1	0.105679	0.193627
TOX3	0.0949605	0.199711
DKK3	0.0879046	0.204016
SYNPO2	0.074855	0.212756
CFB	0.071325	0.215328
NTN4	0.0712475	0.215386
CCL2	0.0711937	0.215426
GLI3	0.0575492	0.226466
AGTR1	0.0566788	0.227239
IL33	0.0560703	0.227786
C6	0.054869	0.22888
YAP1	0.0538851	0.22979
VIT	0.0520241	0.23155
TP63	0.0515616	0.231995
CYP4B1	0.0376161	0.247277
PDGFRA	0.0367052	0.248431
VNN3	0.0344334	0.251415
GIMAP1	0.0340648	0.251915
ITGA8	0.0327324	0.25376
F2RL1	0.0296568	0.258271
FMO1	0.0292777	0.258854
HLX	0.0253176	0.265359
FCGR3B	0.0230755	0.269433
SERPINE2	0.0214741	0.272555
PAX9	0.0210938	0.273325
CPXM2	0.0202585	0.275059
TWIST1	0.0194287	0.276844
CAV1	0.0183252	0.279321
PMEPA1	0.0172546	0.281848
BMP4	0.0172043	0.281971
CCL8	0.0147116	0.288442
CXCL12	0.0137533	0.291183
LGI4	0.0124869	0.295072
SVEP1	0.0124143	0.295305
ADAMTS2	0.0118011	0.297322
KIAA1462	0.0113868	0.298737
NOTCH2	0.0105474	0.301747
EGFLAM	0.00918017	0.307129
LYPD3	0.0074593	0.315
NKAIN2	0.00741724	0.315212
GJA1	0.00738035	0.315398
KDR	0.00702831	0.31722
RNASE1	0.00667735	0.319118
GABRP	0.00410629	0.336569
MPZL2	0.00327096	0.344406
FAM189A1	0.00252557	0.353085
CFHR1	0.00249838	0.353443
MMP1	0.00229623	0.35622
FMO4	0.00224815	0.356913
SATB2	0.002158	0.358248
CLEC2B	0.00214801	0.358399
S100A11	0.00191961	0.362037
UST	0.00179886	0.36412
TBX15	0.00109733	0.379534
DYSF	0.000965151	0.383417
SEMA3B	0.000651724	0.395012
SNTB1	0.000634509	0.395788
UNC5A	0.000467877	0.404482
FOXP2	0.000280805	0.418545
CLIC6	0.00024429	0.422277
SCNN1B	0.0002034	0.427121
TMEM133	0.000169196	0.431916
NFIB	0.000124107	0.439832
SCN11A	0.000119797	0.440722
BNC2	0.0001108	0.44268
NHSL1	7.02e-05	0.453894
CCL11	3.11e-05	0.473013
VWA5B1	3e-05	0.473767
AKR1C3	1.73e-05	0.486114
FAS	1.63e-05	0.487302
RASSF9	1.44e-05	0.4901
RSPO3	1.31e-05	0.492053
UNC5C	1.15e-05	0.494783
ITLN1	1.07e-05	0.496481
NXN	1.01e-05	0.497704
TNFRSF11A	6e-06	0.508399
SPRR2A	5.1e-06	0.511684
PCDH17	3.07e-06	0.521733
AKR1C1	2.85e-06	0.523206
ZNF311	4.61e-07	0.556739
PDZRN3	3.26e-07	0.562751
OSBPL10	9.72e-08	0.582745
CRYBG3	2.1e-08	0.606289
LPAR1	1.33e-08	0.612994
ALPK1	5.44e-09	0.625595
IL20RA	1.55e-09	0.642418
ZIC4	3.61e-10	0.660728
CCDC170	5.63e-11	0.682377
CDH12	7.39e-12	0.704095
CSMD3	3.04e-12	0.713015
SLC44A5	1.01e-12	0.723678
DLGAP1	6.2e-14	0.748507
