# Supplementary material for: Integrated analysis of DNA methylation and mRNA expression profiles to identify key genes involved in the regrowth of clinically non-functioning pituitary adenoma
Source: Aging (Albany NY). 2020 Feb 3;12(3):2408–27. doi: 10.18632/aging.102751 (PMC7041752; doi:10.18632/aging.102751)
Supplement: Supplementary Table 5 [file aging-12-102751-s005..xlsx]

## Sheet: Sheet1
Supplement Table 5 GO&KEGG analyses of 139 genes
Category	Term	Count	%	P value	Genes	List Total	Pop Hits	Pop Total	Fold Enrichment	Bonferroni	Benjamini	FDR
GOTERM_BP_DIRECT	GO:0060326~cell chemotaxis	7	0.0365822	9.11e-06	AGTR1, CCL2, PDGFRA, CCL8, LPAR1, CCL16, CXCL12	127	65	16792	14.2391	0.0113462	0.0113462	0.0148011
GOTERM_BP_DIRECT	GO:0001938~positive regulation of endothelial cell proliferation	7	0.0365822	1.29e-05	CCL11, BMP4, CDH13, EGR3, CCL2, CXCL12, KDR	127	69	16792	13.4137	0.0160311	0.00804792	0.0209614
GOTERM_BP_DIRECT	GO:0050729~positive regulation of inflammatory response	7	0.0365822	1.79e-05	CCL11, AGTR1, CCL2, S100A8, CCL8, IL33, CCL16	127	73	16792	12.6787	0.0221459	0.00743714	0.0290458
GOTERM_BP_DIRECT	GO:0070374~positive regulation of ERK1 and ERK2 cascade	9	0.0470342	5.24e-05	CCL11, BMP4, CCL2, F2RL1, PDGFRA, PYCARD, CCL8, CCL16, KDR	127	175	16792	6.79991	0.0635252	0.0162743	0.085101
GOTERM_BP_DIRECT	GO:0048745~smooth muscle tissue development	4	0.0209041	6.51e-05	BMP4, ITGA8, TP63, FOXP2	127	11	16792	48.0802	0.0783785	0.0161916	0.10582
GOTERM_BP_DIRECT	GO:0030335~positive regulation of cell migration	9	0.0470342	7.46e-05	CCL11, BMP4, CDH13, NTF3, F2RL1, PDGFRA, SEMA3B, MMP14, KDR	127	184	16792	6.46731	0.0892007	0.0154515	0.121125
GOTERM_BP_DIRECT	GO:0048701~embryonic cranial skeleton morphogenesis	5	0.0261301	8.13e-05	BMP4, TBX15, PDGFRA, MMP14, TWIST1	127	31	16792	21.3259	0.0968337	0.0144445	0.132028
GOTERM_BP_DIRECT	GO:0002548~monocyte chemotaxis	5	0.0261301	0.000271	CCL11, TNFRSF11A, CCL2, CCL8, CCL16	127	42	16792	15.7405	0.288208	0.0416058	0.440029
GOTERM_BP_DIRECT	GO:0007165~signal transduction	21	0.109747	0.000396	ING2, CCL2, ZP2, NTF3, S100A11, RASSF9, CCL8, GJA1, CXCL12, STAT6, CCL11, TNFRSF11A, LILRA2, UNC5A, OR52E8, PYCARD, WIF1, FAS, UNC5C, SH3GL2, GABRP	127	1161	16792	2.39158	0.391305	0.053666	0.641898
GOTERM_BP_DIRECT	GO:0006954~inflammatory response	11	0.0574863	0.000576	CCL11, TNFRSF11A, CCL2, S100A8, CRP, F2RL1, PYCARD, CCL8, FAS, CCL16, CXCL12	127	379	16792	3.83753	0.514041	0.0696208	0.931715
GOTERM_BP_DIRECT	GO:0000122~negative regulation of transcription from RNA polymerase II promoter	15	0.0783904	0.00101608	BMP4, CAV1, SATB2, TBX15, ARID5B, TP63, WWTR1, GLI3, FOXP2, STAT6, MYOCD, HEY1, ETS2, NFIB, TWIST1	127	720	16792	2.75459	0.720233	0.109347	1.63877
GOTERM_BP_DIRECT	GO:0048247~lymphocyte chemotaxis	4	0.0209041	0.00117822	CCL11, CCL2, CCL8, CCL16	127	28	16792	18.8886	0.771721	0.115824	1.89793
GOTERM_BP_DIRECT	GO:0030593~neutrophil chemotaxis	5	0.0261301	0.00152086	CCL11, CCL2, S100A8, CCL8, CCL16	127	66	16792	10.0167	0.851488	0.136446	2.44348
GOTERM_BP_DIRECT	GO:0002544~chronic inflammatory response	3	0.0156781	0.00194279	CCL11, S100A8, GJA1	127	9	16792	44.0735	0.912549	0.159744	3.11137
GOTERM_BP_DIRECT	GO:0071347~cellular response to interleukin-1	5	0.0261301	0.0019922	CCL11, CCL2, PYCARD, CCL8, CCL16	127	71	16792	9.3113	0.917809	0.153446	3.1893
GOTERM_BP_DIRECT	GO:0070098~chemokine-mediated signaling pathway	5	0.0261301	0.0019922	CCL11, CCL2, CCL8, CCL16, CXCL12	127	71	16792	9.3113	0.917809	0.153446	3.1893
GOTERM_BP_DIRECT	GO:0016485~protein processing	5	0.0261301	0.00209729	RHBDF1, CPXM2, MMP14, GLI3, ADAMTS2	127	72	16792	9.18198	0.927969	0.151611	3.35487
GOTERM_BP_DIRECT	GO:0050918~positive chemotaxis	4	0.0209041	0.00226568	BMP4, NTF3, CCL16, CXCL12	127	35	16792	15.1109	0.941698	0.153955	3.61959
GOTERM_BP_DIRECT	GO:0003184~pulmonary valve morphogenesis	3	0.0156781	0.00241657	BMP4, NOTCH2, HEY1	127	10	16792	39.6661	0.951763	0.155005	3.85624
GOTERM_BP_DIRECT	GO:0060021~palate development	5	0.0261301	0.00255604	SATB2, BNC2, ARID5B, GLI3, TWIST1	127	76	16792	8.69872	0.959515	0.155305	4.07447
GOTERM_BP_DIRECT	GO:0008284~positive regulation of cell proliferation	11	0.0574863	0.00269471	AKR1C3, TNFRSF11A, NTF3, MYOCD, HLX, TNC, PDGFRA, FABP1, YAP1, WWTR1, KDR	127	466	16792	3.12108	0.965987	0.155534	4.291
GOTERM_BP_DIRECT	GO:0045944~positive regulation of transcription from RNA polymerase II promoter	17	0.0888424	0.00274472	BMP4, SATB2, F2RL1, TP63, IL33, WWTR1, GLI3, STAT6, CDH13, MYOCD, PAX9, HEY1, ETS2, YAP1, NFIB, TWIST1, NFATC1	127	981	16792	2.29128	0.968059	0.151253	4.36899
GOTERM_BP_DIRECT	GO:0050927~positive regulation of positive chemotaxis	3	0.0156781	0.00293912	CDH13, F2RL1, KDR	127	11	16792	36.0601	0.974981	0.154344	4.67152
GOTERM_BP_DIRECT	GO:0006874~cellular calcium ion homeostasis	5	0.0261301	0.00527674	CCL11, CAV1, CCL2, CCL8, CXCL12	127	93	16792	7.10863	0.998679	0.25041	8.23996
GOTERM_BP_DIRECT	GO:0007411~axon guidance	6	0.0313562	0.006969	UNC5A, NTN4, SEMA3B, UNC5C, GLI3, CXCL12	127	159	16792	4.98945	0.999844	0.305882	10.7446
GOTERM_BP_DIRECT	GO:0030178~negative regulation of Wnt signaling pathway	4	0.0209041	0.00697497	DKK3, NXN, WIF1, NFATC1	127	52	16792	10.1708	0.999845	0.295883	10.7533
GOTERM_BP_DIRECT	GO:2000778~positive regulation of interleukin-6 secretion	3	0.0156781	0.00705695	F2RL1, PYCARD, TWIST1	127	17	16792	23.333	0.99986	0.289152	10.873
GOTERM_BP_DIRECT	GO:0043066~negative regulation of apoptotic process	10	0.0522603	0.00734661	BMP4, NOTCH2, EGR3, COMP, TP63, FABP1, FAS, GLI3, KDR, TWIST1	127	455	16792	2.90594	0.999903	0.289791	11.2946
GOTERM_BP_DIRECT	GO:0007155~cell adhesion	10	0.0522603	0.00775915	CCL11, CDH13, KIAA1462, CCL2, SVEP1, COMP, TNC, ITGA8, PCDH17, CXCL12	127	459	16792	2.88062	0.999942	0.294308	11.8919
GOTERM_BP_DIRECT	GO:0001649~osteoblast differentiation	5	0.0261301	0.00780377	BMP4, TNC, GJA1, WWTR1, TWIST1	127	104	16792	6.35675	0.999945	0.287161	11.9563
GOTERM_BP_DIRECT	GO:0048557~embryonic digestive tract morphogenesis	3	0.0156781	0.00790032	HLX, PDGFRA, GLI3	127	18	16792	22.0367	0.999952	0.281996	12.0955
GOTERM_BP_DIRECT	GO:0042475~odontogenesis of dentin-containing tooth	4	0.0209041	0.00814653	BMP4, TNC, TP63, GLI3	127	55	16792	9.61603	0.999965	0.281526	12.4494
GOTERM_BP_DIRECT	GO:0042733~embryonic digit morphogenesis	4	0.0209041	0.00856118	BMP4, GJA1, GLI3, TWIST1	127	56	16792	9.44432	0.999979	0.285853	13.0424
GOTERM_BP_DIRECT	GO:0001570~vasculogenesis	4	0.0209041	0.00856118	CAV1, MYOCD, YAP1, KDR	127	56	16792	9.44432	0.999979	0.285853	13.0424
GOTERM_BP_DIRECT	GO:0071346~cellular response to interferon-gamma	4	0.0209041	0.00898803	CCL11, CCL2, CCL8, CCL16	127	57	16792	9.27863	0.999988	0.290231	13.6489
GOTERM_BP_DIRECT	GO:0071356~cellular response to tumor necrosis factor	5	0.0261301	0.00946844	CCL11, CCL2, PYCARD, CCL8, CCL16	127	110	16792	6.01002	0.999993	0.295736	14.3268
GOTERM_BP_DIRECT	GO:0009612~response to mechanical stimulus	4	0.0209041	0.00987861	CCL2, TNC, MMP14, CXCL12	127	59	16792	8.9641	0.999996	0.299116	14.9016
GOTERM_BP_DIRECT	GO:0045669~positive regulation of osteoblast differentiation	4	0.0209041	0.0103425	BMP4, TP63, GJA1, GLI3	127	60	16792	8.8147	0.999998	0.303613	15.5472
GOTERM_BP_DIRECT	GO:0030574~collagen catabolic process	4	0.0209041	0.0123232	MMP14, ADAMTS2, MMP13, MMP1	127	64	16792	8.26378	1	0.342897	18.253
GOTERM_BP_DIRECT	GO:0035924~cellular response to vascular endothelial growth factor stimulus	3	0.0156781	0.0127488	EGR3, ERN1, KDR	127	23	16792	17.2461	1	0.344972	18.8236
GOTERM_BP_DIRECT	GO:0006935~chemotaxis	5	0.0261301	0.0134545	CCL11, CCL2, CCL8, CCL16, CXCL12	127	122	16792	5.41887	1	0.352867	19.7617
GOTERM_BP_DIRECT	GO:0030511~positive regulation of transforming growth factor beta receptor signaling pathway	3	0.0156781	0.0138401	ING2, MYOCD, ITGA8	127	24	16792	16.5276	1	0.353751	20.2699
GOTERM_BP_DIRECT	GO:0030855~epithelial cell differentiation	4	0.0209041	0.0156754	GSTA1, GSTA2, BDH2, AKR1C1	127	70	16792	7.55546	1	0.382977	22.6477
GOTERM_BP_DIRECT	GO:0071300~cellular response to retinoic acid	4	0.0209041	0.0156754	CCL2, TNC, YAP1, FZD7	127	70	16792	7.55546	1	0.382977	22.6477
GOTERM_BP_DIRECT	GO:0001958~endochondral ossification	3	0.0156781	0.0161392	BMP4, MMP14, MMP13	127	26	16792	15.2562	1	0.384558	23.238
GOTERM_BP_DIRECT	GO:0030198~extracellular matrix organization	6	0.0313562	0.0161553	EGFLAM, COMP, TNC, ITGA8, VIT, KDR	127	196	16792	4.04757	1	0.377868	23.2584
GOTERM_BP_DIRECT	GO:0042476~odontogenesis	3	0.0156781	0.0173458	BMP4, PAX9, TWIST1	127	27	16792	14.6912	1	0.392434	24.7538
GOTERM_BP_DIRECT	GO:0007204~positive regulation of cytosolic calcium ion concentration	5	0.0261301	0.018375	AGTR1, F2RL1, PDGFRA, GJA1, LPAR1	127	134	16792	4.9336	1	0.403336	26.0247
GOTERM_BP_DIRECT	GO:0051482~positive regulation of cytosolic calcium ion concentration involved in phospholipase C-activating G-protein coupled signaling pathway	3	0.0156781	0.0185894	AGTR1, F2RL1, LPAR1	127	28	16792	14.1665	1	0.40018	26.2868
GOTERM_BP_DIRECT	GO:0009314~response to radiation	3	0.0156781	0.0185894	CCL11, TNFRSF11A, CXCL12	127	28	16792	14.1665	1	0.40018	26.2868
GOTERM_BP_DIRECT	GO:0030216~keratinocyte differentiation	4	0.0209041	0.0194917	AKR1C3, SPRR2A, TP63, YAP1	127	76	16792	6.95897	1	0.40831	27.3807
GOTERM_BP_DIRECT	GO:0042060~wound healing	4	0.0209041	0.022296	S100A8, TNC, PDGFRA, GLI3	127	80	16792	6.61102	1	0.444899	30.6838
GOTERM_BP_DIRECT	GO:2000721~positive regulation of transcription from RNA polymerase II promoter involved in smooth muscle cell differentiation	2	0.0104521	0.0223436	MYOCD, ITGA8	127	3	16792	88.147	1	0.438889	30.7386
GOTERM_BP_DIRECT	GO:0060197~cloacal septation	2	0.0104521	0.0223436	BMP4, TP63	127	3	16792	88.147	1	0.438889	30.7386
GOTERM_BP_DIRECT	GO:2001244~positive regulation of intrinsic apoptotic signaling pathway	3	0.0156781	0.0253434	CAV1, S100A8, IL20RA	127	33	16792	12.02	1	0.474441	34.1132
GOTERM_BP_DIRECT	GO:0043065~positive regulation of apoptotic process	7	0.0365822	0.0256615	BMP4, ING2, PYCARD, MNDA, FAS, LPAR1, UNC5C	127	300	16792	3.08514	1	0.47202	34.4618
GOTERM_BP_DIRECT	GO:0048286~lung alveolus development	3	0.0156781	0.0267972	BMP4, MYOCD, FOXP2	127	34	16792	11.6665	1	0.480308	35.6925
GOTERM_BP_DIRECT	GO:0001822~kidney development	4	0.0209041	0.0268934	BMP4, AGTR1, ITGA8, ARID5B	127	86	16792	6.14979	1	0.475079	35.7958
GOTERM_BP_DIRECT	GO:0006915~apoptotic process	10	0.0522603	0.0270416	NOTCH2, S100A8, UNC5A, COMP, PYCARD, TP63, GJA1, FAS, UNC5C, TOX3	127	567	16792	2.33193	1	0.47065	35.9545
GOTERM_BP_DIRECT	GO:0003104~positive regulation of glomerular filtration	2	0.0104521	0.0296808	F2RL1, GJA1	127	4	16792	66.1102	1	0.496625	38.7205
GOTERM_BP_DIRECT	GO:0071395~cellular response to jasmonic acid stimulus	2	0.0104521	0.0296808	AKR1C3, AKR1C1	127	4	16792	66.1102	1	0.496625	38.7205
GOTERM_BP_DIRECT	GO:0008285~negative regulation of cell proliferation	8	0.0418082	0.0297919	BMP4, NOTCH2, CDH13, ING2, SERPINE2, MYOCD, S100A11, GLI3	127	396	16792	2.67112	1	0.491721	38.8345
GOTERM_BP_DIRECT	GO:0009887~organ morphogenesis	4	0.0209041	0.0319585	NOTCH2, CCL2, PAX9, COMP	127	92	16792	5.74872	1	0.510318	41.0171
GOTERM_BP_DIRECT	GO:0045892~negative regulation of transcription, DNA-templated	9	0.0470342	0.0344145	BMP4, DKK3, HEY1, PAX9, ARID5B, TP63, GLI3, FOXP2, TWIST1	127	499	16792	2.38474	1	0.530725	43.4029
GOTERM_BP_DIRECT	GO:0048704~embryonic skeletal system morphogenesis	3	0.0156781	0.0345495	SATB2, PDGFRA, GLI3	127	39	16792	10.1708	1	0.526078	43.5313
GOTERM_BP_DIRECT	GO:0060157~urinary bladder development	2	0.0104521	0.0369634	MYOCD, TP63	127	5	16792	52.8882	1	0.544585	45.7829
GOTERM_BP_DIRECT	GO:0003417~growth plate cartilage development	2	0.0104521	0.0369634	COMP, MMP13	127	5	16792	52.8882	1	0.544585	45.7829
GOTERM_BP_DIRECT	GO:0033564~anterior/posterior axon guidance	2	0.0104521	0.0369634	UNC5A, UNC5C	127	5	16792	52.8882	1	0.544585	45.7829
GOTERM_BP_DIRECT	GO:0038007~netrin-activated signaling pathway	2	0.0104521	0.0369634	UNC5A, UNC5C	127	5	16792	52.8882	1	0.544585	45.7829
GOTERM_BP_DIRECT	GO:0045893~positive regulation of transcription, DNA-templated	9	0.0470342	0.0402535	BMP4, ING2, MYOCD, ETS2, TP63, GLI3, TOX3, FZD7, NFATC1	127	515	16792	2.31065	1	0.569991	48.7163
GOTERM_BP_DIRECT	GO:0001666~response to hypoxia	5	0.0261301	0.0406674	CAV1, CCL2, MYOCD, MMP14, CXCL12	127	172	16792	3.84362	1	0.567881	49.0746
GOTERM_BP_DIRECT	GO:0007267~cell-cell signaling	6	0.0313562	0.0426227	TNFRSF11A, NTF3, CCL8, GJA1, SEMA3B, CCL16	127	254	16792	3.12332	1	0.579502	50.7357
GOTERM_BP_DIRECT	GO:0072307~regulation of metanephric nephron tubule epithelial cell differentiation	2	0.0104521	0.0441917	YAP1, WWTR1	127	6	16792	44.0735	1	0.587241	52.0317
GOTERM_BP_DIRECT	GO:0003180~aortic valve morphogenesis	2	0.0104521	0.0441917	BMP4, TWIST1	127	6	16792	44.0735	1	0.587241	52.0317
GOTERM_BP_DIRECT	GO:0060363~cranial suture morphogenesis	2	0.0104521	0.0441917	BMP4, TWIST1	127	6	16792	44.0735	1	0.587241	52.0317
GOTERM_BP_DIRECT	GO:0071799~cellular response to prostaglandin D stimulus	2	0.0104521	0.0441917	AKR1C3, TNC	127	6	16792	44.0735	1	0.587241	52.0317
GOTERM_BP_DIRECT	GO:0051150~regulation of smooth muscle cell differentiation	2	0.0104521	0.0441917	BMP4, MYOCD	127	6	16792	44.0735	1	0.587241	52.0317
GOTERM_BP_DIRECT	GO:0043615~astrocyte cell migration	2	0.0104521	0.0441917	CCL2, MMP14	127	6	16792	44.0735	1	0.587241	52.0317
GOTERM_BP_DIRECT	GO:0003158~endothelium development	2	0.0104521	0.0441917	GJA1, KDR	127	6	16792	44.0735	1	0.587241	52.0317
GOTERM_BP_DIRECT	GO:0001764~neuron migration	4	0.0209041	0.0445137	SATB2, GJA1, CXCL12, TWIST1	127	105	16792	5.03697	1	0.584292	52.2936
GOTERM_BP_DIRECT	GO:0051091~positive regulation of sequence-specific DNA binding transcription factor activity	4	0.0209041	0.0445137	TNFRSF11A, MYOCD, ARID5B, PYCARD	127	105	16792	5.03697	1	0.584292	52.2936
GOTERM_BP_DIRECT	GO:0032760~positive regulation of tumor necrosis factor production	3	0.0156781	0.0484965	CCL2, PYCARD, TWIST1	127	47	16792	8.4396	1	0.610843	55.425
GOTERM_CC_DIRECT	GO:0005576~extracellular region	30	0.156781	3.43e-06	PZP, CCL2, S100A8, TNC, C6, CRP, IL33, CXCL12, MMP1, LILRA2, SERPINE2, VWA5B1, RSPO3, COMP, PYCARD, LGI4, BMP4, SVEP1, ZP2, NTF3, CFB, NTN4, CCL16, MMP13, KDR, CCL11, NOTCH2, DKK3, WIF1, ADAMTS2	133	1610	18224	2.55322	0.000532	0.000532	0.00412486
GOTERM_CC_DIRECT	GO:0005615~extracellular space	23	0.120199	0.000261	BMP4, CCL2, LYPD3, S100A8, CFB, TNC, CRP, S100A11, CCL8, CPXM2, IL33, CCL16, CXCL12, MMP13, CFHR1, CCL11, DKK3, CDH13, SERPINE2, COMP, LGI4, SEMA3B, VNN3	133	1347	18224	2.33966	0.0396379	0.0200194	0.312876
GOTERM_CC_DIRECT	GO:0045202~synapse	8	0.0418082	0.000352	DLGAP1, EGFLAM, CCL2, SNTB1, UNC5C, KCNK1, SH3GL2, GABRP	133	181	18224	6.05625	0.0531796	0.0180504	0.4225
GOTERM_CC_DIRECT	GO:0005886~plasma membrane	45	0.235171	0.00304622	CAV1, ING2, S100A8, SLC6A20, SLC44A5, F2RL1, NKAIN2, CSMD3, GJA1, LPAR1, AGTR1, TNFRSF11A, DYSF, KRT5, UNC5A, CLEC2B, FAS, UNC5C, SCNN1B, FCGR3B, GABRP, VNN3, S100A16, ZP2, CFB, NTN4, MMP14, KCNK1, PCDH17, FZD7, KDR, CDH12, NOTCH2, CDH13, IL20RA, BNC2, ITGA8, ETS2, OR52E8, CLIC6, CYBRD1, PDGFRA, SCN11A, PMEPA1, SH3GL2	133	4121	18224	1.49624	0.376798	0.1115	3.59759
GOTERM_CC_DIRECT	GO:0005614~interstitial matrix	3	0.0156781	0.00385447	EGFLAM, TNC, VIT	133	13	18224	31.6206	0.450418	0.112831	4.53201
GOTERM_CC_DIRECT	GO:0045121~membrane raft	7	0.0365822	0.00390775	STAT6, CAV1, UNC5A, ITLN1, GJA1, FAS, KDR	133	206	18224	4.65611	0.454955	0.0962006	4.59331
GOTERM_CC_DIRECT	GO:0070062~extracellular exosome	33	0.172459	0.0052711	PZP, S100A8, C6, ITLN1, CRP, GJA1, RASSF9, CXCL12, AKR1C3, CFHR1, EFHD1, DYSF, KRT5, COMP, BDH2, SEMA3B, FAS, SCNN1B, FCGR3B, AKR1C1, GSTA1, GSTA2, RNASE1, S100A16, CFB, S100A11, CDH13, CLIC6, CYBRD1, MNDA, FABP1, SCN11A, SH3GL2	133	2811	18224	1.60859	0.559207	0.110438	6.14977
GOTERM_CC_DIRECT	GO:0031012~extracellular matrix	8	0.0418082	0.00583459	ZP2, SERPINE2, COMP, TNC, CPXM2, MMP14, MMP13, MMP1	133	296	18224	3.70331	0.59627	0.107185	6.78625
GOTERM_CC_DIRECT	GO:0005578~proteinaceous extracellular matrix	7	0.0365822	0.013442	BMP4, ZP2, COMP, VIT, ADAMTS2, MMP13, MMP1	133	268	18224	3.57895	0.877254	0.207903	15.0005
GOTERM_CC_DIRECT	GO:0044299~C-fiber	2	0.0104521	0.0144343	CCL2, SCN11A	133	2	18224	137.023	0.894982	0.201773	16.0216
GOTERM_CC_DIRECT	GO:0009897~external side of plasma membrane	6	0.0313562	0.0194982	CDH13, TNFRSF11A, VTCN1, FAS, SCNN1B, CXCL12	133	213	18224	3.85979	0.952739	0.242295	21.0593
GOTERM_CC_DIRECT	GO:0005925~focal adhesion	8	0.0418082	0.0238366	CDH13, CAV1, TNC, ITGA8, SNTB1, GJA1, SYNPO2, MMP14	133	391	18224	2.80353	0.976232	0.267739	25.1534
GOTERM_CC_DIRECT	GO:0005768~endosome	6	0.0313562	0.0240272	CAV1, DYSF, RASSF9, LPAR1, KCNK1, KDR	133	225	18224	3.65393	0.976941	0.251718	25.3287
GOTERM_CC_DIRECT	GO:0031225~anchored component of membrane	4	0.0209041	0.0489379	CDH13, ITLN1, FCGR3B, VNN3	133	113	18224	4.85036	0.999581	0.426226	45.2603
GOTERM_MF_DIRECT	GO:0005509~calcium ion binding	16	0.0836164	0.000247	S100A16, SVEP1, S100A8, CRP, S100A11, PCDH17, MMP14, MMP13, MMP1, CDH12, NOTCH2, CDH13, EFHD1, EGFLAM, DYSF, COMP	125	717	16881	3.01362	0.0669572	0.0669572	0.325756
GOTERM_MF_DIRECT	GO:0008009~chemokine activity	5	0.0261301	0.000455	CCL11, CCL2, CCL8, CCL16, CXCL12	125	49	16881	13.7804	0.12007	0.0619542	0.600411
GOTERM_MF_DIRECT	GO:0042056~chemoattractant activity	4	0.0209041	0.000995	BMP4, NTF3, CCL16, CXCL12	125	27	16881	20.0071	0.243958	0.0890066	1.30802
GOTERM_MF_DIRECT	GO:0005102~receptor binding	9	0.0470342	0.0045495	CAV1, CCL2, NTF3, SERPINE2, VTCN1, RSPO3, F2RL1, GJA1, CXCL12	125	353	16881	3.44315	0.722331	0.274092	5.8542
GOTERM_MF_DIRECT	GO:0008201~heparin binding	6	0.0313562	0.00654971	BMP4, CCL2, SERPINE2, RSPO3, COMP, CCL8	125	160	16881	5.0643	0.842215	0.308785	8.32635
GOTERM_MF_DIRECT	GO:0005539~glycosaminoglycan binding	3	0.0156781	0.00758274	EGFLAM, SERPINE2, VIT	125	18	16881	22.508	0.882212	0.299862	9.57949
GOTERM_MF_DIRECT	GO:0048020~CCR chemokine receptor binding	3	0.0156781	0.0122426	CCL11, CCL8, CCL16	125	23	16881	17.615	0.968614	0.390116	15.0379
GOTERM_MF_DIRECT	GO:0042803~protein homodimerization activity	12	0.0627123	0.0186077	CDH13, S100A16, TBX15, GIMAP7, PDGFRA, PYCARD, ERN1, S100A11, WWTR1, TOX3, FOXP2, TWIST1	125	730	16881	2.21997	0.994897	0.483021	22.0024
GOTERM_MF_DIRECT	GO:0050699~WW domain binding	3	0.0156781	0.02166	TP63, SCNN1B, PMEPA1	125	31	16881	13.0692	0.997874	0.495257	25.1514
GOTERM_MF_DIRECT	GO:0047086~ketosteroid monooxygenase activity	2	0.0104521	0.0218764	AKR1C3, AKR1C1	125	3	16881	90.032	0.998002	0.462889	25.3701
GOTERM_MF_DIRECT	GO:0047718~indanol dehydrogenase activity	2	0.0104521	0.0218764	AKR1C3, AKR1C1	125	3	16881	90.032	0.998002	0.462889	25.3701
GOTERM_MF_DIRECT	GO:0003682~chromatin binding	8	0.0418082	0.0253767	SATB2, ING2, SVEP1, TP63, FABP1, YAP1, GLI3, TOX3	125	391	16881	2.76313	0.99927	0.481403	28.8271
GOTERM_MF_DIRECT	GO:0030165~PDZ domain binding	4	0.0209041	0.0254618	SNTB1, GJA1, LPAR1, FZD7	125	86	16881	6.2813	0.999288	0.453353	28.9092
GOTERM_MF_DIRECT	GO:0004364~glutathione transferase activity	3	0.0156781	0.0271943	GSTA1, GSTA2, CLIC6	125	35	16881	11.5755	0.999568	0.448964	30.5632
GOTERM_MF_DIRECT	GO:0018636~phenanthrene 9,10-monooxygenase activity	2	0.0104521	0.0290625	AKR1C3, AKR1C1	125	4	16881	67.524	0.999748	0.446764	32.3068
GOTERM_MF_DIRECT	GO:0047115~trans-1,2-dihydrobenzene-1,2-diol dehydrogenase activity	2	0.0104521	0.0290625	AKR1C3, AKR1C1	125	4	16881	67.524	0.999748	0.446764	32.3068
GOTERM_MF_DIRECT	GO:0038085~vascular endothelial growth factor binding	2	0.0104521	0.0361963	PDGFRA, KDR	125	5	16881	54.0192	0.999968	0.498752	38.5991
GOTERM_MF_DIRECT	GO:0004499~N,N-dimethylaniline monooxygenase activity	2	0.0104521	0.043278	FMO4, FMO1	125	6	16881	45.016	0.999996	0.540221	44.3068
KEGG_PATHWAY	hsa04060:Cytokine-cytokine receptor interaction	9	0.0470342	0.000856	CCL11, TNFRSF11A, CCL2, IL20RA, PDGFRA, CCL8, FAS, CXCL12, KDR	62	230	6910	4.36115	0.0937937	0.0937937	0.970789
KEGG_PATHWAY	hsa05200:Pathways in cancer	9	0.0470342	0.0212929	BMP4, AGTR1, PDGFRA, FAS, LPAR1, GLI3, CXCL12, FZD7, MMP1	62	393	6910	2.55233	0.915848	0.70991	21.7423
KEGG_PATHWAY	hsa00982:Drug metabolism - cytochrome P450	4	0.0209041	0.021856	GSTA1, FMO4, GSTA2, FMO1	62	68	6910	6.55598	0.921238	0.571347	22.2537
KEGG_PATHWAY	hsa04360:Axon guidance	5	0.0261301	0.0253812	UNC5A, NTN4, SEMA3B, UNC5C, CXCL12	62	127	6910	4.38786	0.948	0.522471	25.3862
KEGG_PATHWAY	hsa04510:Focal adhesion	6	0.0313562	0.0346389	CAV1, COMP, TNC, ITGA8, PDGFRA, KDR	62	206	6910	3.24616	0.982649	0.555506	33.0725
KEGG_PATHWAY	hsa05323:Rheumatoid arthritis	4	0.0209041	0.0423109	TNFRSF11A, CCL2, CXCL12, MMP1	62	88	6910	5.06598	0.993069	0.563346	38.8872
