# Supplementary material for: Integrated analysis of DNA methylation and mRNA expression profiles to identify key genes involved in the regrowth of clinically non-functioning pituitary adenoma
Source: Aging (Albany NY). 2020 Feb 3;12(3):2408–27. doi: 10.18632/aging.102751 (PMC7041752; doi:10.18632/aging.102751)
Supplement: Supplementary Table 6 [file aging-12-102751-s003..xlsx]

## Sheet: Sheet1
Supplement Table 6 GO&KEGG analyses of 13 genes
Category	Term	Count	%	P value	Genes	List Total	Pop Hits	Pop Total	Fold Enrichment	Bonferroni	Benjamini	FDR
GOTERM_BP_DIRECT	GO:0006351~transcription, DNA-templated	6	0.323799	0.00536738	STAT6, MYT1L, ING2, HEY1, ETS2, ERN1	12	1955	16792	4.29463	0.626514	0.626514	6.43124
GOTERM_BP_DIRECT	GO:0001935~endothelial cell proliferation	2	0.107933	0.0117318	ERN1, MMP14	12	18	16792	155.481	0.88463	0.660339	13.5637
GOTERM_MF_DIRECT	GO:0042802~identical protein binding	4	0.215866	0.0141731	STAT6, PYCARD, ERN1, SH3GL2	13	749	16881	6.93478	0.550388	0.550388	13.1469
GOTERM_CC_DIRECT	GO:0005737~cytoplasm	8	0.431732	0.0166522	STAT6, ING2, HEY1, ETS2, PYCARD, ERN1, MMP14, SH3GL2	12	5222	18224	2.32657	0.560813	0.560813	14.8713
GOTERM_BP_DIRECT	GO:0045746~negative regulation of Notch signaling pathway	2	0.107933	0.0188395	HEY1, MMP14	12	29	16792	96.5057	0.969209	0.686568	20.9362
GOTERM_MF_DIRECT	GO:0003677~DNA binding	5	0.269833	0.0248845	STAT6, MYT1L, ING2, HEY1, ETS2	13	1674	16881	3.87855	0.75614	0.506178	22.0286
GOTERM_MF_DIRECT	GO:0003700~transcription factor activity, sequence-specific DNA binding	4	0.215866	0.0274888	STAT6, MYT1L, HEY1, ETS2	13	961	16881	5.40495	0.790058	0.405663	24.0607
GOTERM_CC_DIRECT	GO:0031526~brush border membrane	2	0.107933	0.0303647	CYBRD1, KCNK1	12	51	18224	59.5556	0.779294	0.530207	25.595
GOTERM_BP_DIRECT	GO:0007165~signal transduction	4	0.215866	0.0357702	STAT6, ING2, PYCARD, SH3GL2	12	1161	16792	4.82113	0.998726	0.811087	36.2314
GOTERM_BP_DIRECT	GO:0006355~regulation of transcription, DNA-templated	4	0.215866	0.0685899	MYT1L, ING2, HEY1, ERN1	12	1504	16792	3.72163	0.999998	0.925774	58.4238
GOTERM_CC_DIRECT	GO:0005634~nucleus	7	0.377766	0.0749648	STAT6, MYT1L, ING2, HEY1, ETS2, PYCARD, USP31	12	5415	18224	1.96319	0.978034	0.71994	52.6275
GOTERM_BP_DIRECT	GO:0000122~negative regulation of transcription from RNA polymerase II promoter	3	0.1619	0.078141	STAT6, HEY1, ETS2	12	720	16792	5.83056	1	0.916388	63.3938
GOTERM_CC_DIRECT	GO:0005886~plasma membrane	6	0.323799	0.0799119	ING2, ETS2, CYBRD1, MMP14, KCNK1, SH3GL2	12	4121	18224	2.21111	0.98311	0.639496	55.0016
GOTERM_MF_DIRECT	GO:0005515~protein binding	10	0.539665	0.0947368	STAT6, FAM90A1, ING2, HEY1, ETS2, CYBRD1, PYCARD, ERN1, MMP14, SH3GL2	13	8785	16881	1.47813	0.996203	0.751773	62.5735
